# Supplementary material for: New particle formation events observed at King Sejong Station, Antarctic Peninsula – Part 1: Physical characteristics and contribution to cloud condensation nuclei
Source: Copernicus journal article supplement (doi:10.5194/acp-2018-1180), 2018-12-14
Supplement: Supplementary file [file acp-2018-1180-AC2-supplement.pdf]

1 **Interactive comment on “New particle formation events observed at**  
2 **King Sejong Station, Antarctic Peninsula – Part 1: Physical**  
3 **characteristics and contribution to cloud condensation nuclei” by**  
4 **Jaeseok Kim et al.**

5  
6 **Anonymous Referee #2**

7  
8 Received and published: 9 January 2019

9  
10 We thank Referee 2 for providing valuable suggestions that improved the readability of our revised manuscript. Our  
11 responses to this Referee’s major and minor points are stated below. The revised manuscript was uploaded in the form of  
12 a supplement.

13  
14  
15 Review comment on "New particle formation events observed at King Sejong Station, Antarctic Peninsula –  
16 Part 1: Physical characteristics and contribution to cloud condensation nuclei" by Jaeseok Kim et al. This  
17 manuscript presents new particle formation (NPF) and its impact on CCN ability at Korean Antarctic research  
18 Station (King Sejong) located in the Antarctic Peninsula. This study is based on long-term aerosol measurements  
19 for several years. To our knowledge, the long-term SMPS measurements through the years in the Antarctic  
20 regions are very limited. Actually, results in the manuscript are important and interesting to understand NPF  
21 and aerosol science in the Antarctic regions. As a whole, the topic of the manuscript is relevant and suitable for  
22 the scope of the “Atmos. Chem. Phys.”. However, there are several points which require some careful revision  
23 and corrections before publication.

24  
25 Major points

26 1. Authors showed NPF occurrence and frequency in Section of 3.1.1. However, time series of CN  
27 concentrations and SMPS results (i.e. contour plots of variations of aerosol size distributions) should be shown  
28 and add explanation before analysis/ discussion of NPF occurrence and frequency. The plots of the typical  
29 examples can provide important information for us.

30  
31 Authors’ response: Authors agree with the referee’s comment. According to previous studies, time series of  
32 aerosol size distributions were showed for reader’s understanding. Thus, examples of contour plots of aerosol  
33 size distributions is added in the revised manuscript (Figure 1).

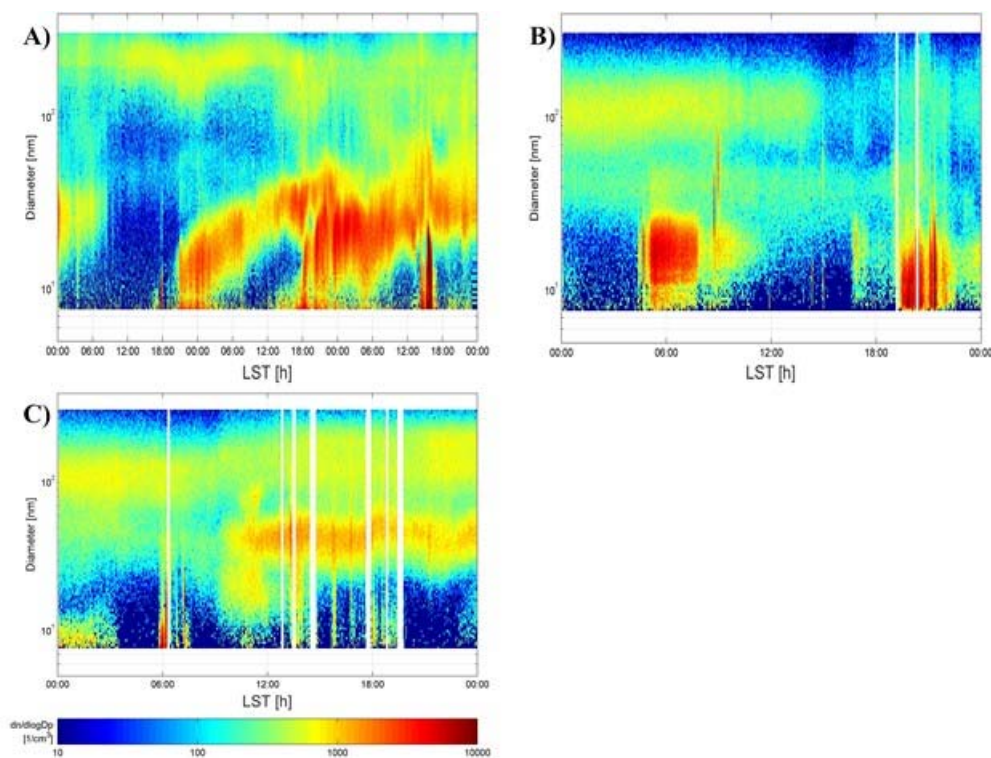

Figure 1. Example of types of the NPF based on the SMPS data. (a) type A (18 January 2011-20 January 2011), (b) type B (13 January 2015) and (c) type C (9 January 2015). Type A is days when the formation and growth of nanoparticles should be clear. Type B is days when the formation occurred but growth was not clear. Type C is days when it cannot be said whether there is an event or not.

2. It is true that emission of aerosol precursors from oceanic bioactivity and atmospheric photochemical reactions are associated with NPF in the Antarctic coasts during summer. Unlike to other Antarctic coastal regions, however, anthropogenic impacts (local contamination) can be larger around the Antarctic Peninsula particularly in the summer because of activity in many stations and ship-borne tourism. Therefore, influence of anthropogenic activity and local contamination should be analyzed and discussed before discussion on contribution of condensable vapors originated from oceanic bioactivity. The following works are useful references.

Shirsat, S. V. and Graf, H. F.: An emission inventory of sulfur from anthropogenic sources in Antarctica, *Atmospheric Chemistry and Physics*, 9(10), 3397–3408, 2009.

Graf, H.-F., Shirsat, S. V., Oppenheimer, C., Jarvis, M. J., Podzun, R., and Jacob, D.: Continental scale Antarctic deposition of sulphur and black carbon from anthropogenic and volcanic sources, *Atmospheric Chemistry and Physics*, doi:10.5194/acp-10-2457-2010, 2010.

Authors' response: Authors agree with the referee's comment. Anthropogenic activity and local contamination do affect the characteristics of Antarctic ambient aerosols, including the NPF events. To minimize the effect of local contamination during the data analysis, we used black carbon concentration, wind speed and wind direction data. We described the methods to minimize the effects of local contamination in section of 2.2. The observatory is located approximately 400m southwest of the main buildings (includes a power generator and crematory). Thus, the northeastern direction (355–55°) is designated as a local pollution sector due to emissions from the power generator and crematory. Data collected from this sector are discarded. In addition, black carbon concentrations were measured simultaneously using an Aethalometer. Details of the Aethalometer measurements were described in detail in the previous work (Kim et al. 2017). Briefly, when black carbon concentration is higher than 100 ng m<sup>-3</sup>, data were also excluded from analysis.

1  
2 Furthermore, air masses in the Antarctic Peninsula were transported frequently from south America. This  
3 transport pathway can lead to high aerosol number concentrations and BC concentrations at Ferraz Station  
4 located in the Antarctic Peninsula (Pereira et al., 2004, 2006). In other words, these studies implied that  
5 anthropogenic aerosol precursors and land-origin aerosol precursors such as organics can be transported and  
6 supplied to the Antarctic Peninsula. Thus, I recommend strongly comparison of number concentrations, NPF  
7 frequency, and FR in each air mass origin.  
8

9 Pereira, K., Evanhelista, H., Pereira, E., Simões, J., Johnson, E., and Melo, L.: Transport of crustal  
10 microparticles from Chilean Patagonia to the Antarctic Peninsula by SEM-EDS analysis, *Tellus B*, 56(3),  
11 262–275, doi:10.1111/j.1600-0889.2004.00105.x, 2004.

12 Pereira, E., Evangelista, H., Pereira, K., Cavalcanti, I., and Setzer, A.: Apportionment of black carbon in the  
13 South Shetland Islands, Antarctic Peninsula, *Journal of Geophysical Research: Atmospheres* (1984–2012),  
14 111(D3), doi:10.1029/2005JD006086, 2006.  
15  
16

17 Authors' response: In table 5, NPF day number and FR were compared according to origin and pathway of air  
18 masses. The frequency of the NPF events of air masses originating from South America (Case I) was too low  
19 (only 3 days in this study) compared with other cases. Out of 101 NPF cases, only 3 cases were categorized as  
20 the cases when air masses came from South America. Because it is not meaningful to represent frequency and  
21 FR of the NPF events of air masses out of only 3 cases (Case I of the table), their analysis results are not shown  
22 in the manuscript.  
23  
24

25 3. Authors stated definition and classification of NPF in Section of 2.2.1 and 2.2.2. Because SMPS measured  
26 size distributions of aerosol particles with size range of  $D > 10$  nm, authors tried likely to identify NPF using the  
27 difference of CN concentrations (e.g.,  $CN_{2.5-10}$ ). Criteria values of  $500 \text{ cm}^{-3}$  were used for the NPF  
28 identification. What is the procedure to decide the criteria values? This criteria is very important basic in this  
29 study. I think that authors were in accordance of procedures shown by Humphries et al. (2016). Considering  
30 that measuring site and conditions were different to sea ice area (Humphries et al., 2016), authors should show  
31 example plots of time series of  $CN_{2.5-10}$  and discuss the suitable criteria values. In addition, classification  
32 of NPF in accordance with previous works (Dal Maso et al., 2005; Yli-Juuti et al., 2009) requires information  
33 about particle growth after NPF. However, the difference of CN concentrations cannot provide information on  
34 particle growth. How did you identify particle growth of nucleation mode ( $D < 10$  nm)?  
35

36 Authors' response: In the previous study (Kim et al., 2017), authors compared seasonal variations of CN  
37 concentrations between 2009 and 2015. Average  $CN_{2.5-10}$  concentration was approximately  $430 \text{ cm}^{-3}$  over the  
38 whole periods. Based on these results (not shown in the text), we used value of  $CN_{2.5-10}$  of  $500 \text{ cm}^{-3}$  as an  
39 empirical condition of the NPF events. This first filtering process has made the selection of NPF more  
40 conservative and reliable before we go for the next condition of the NPF occurrence. Next process was using,  
41  $CN_{2.5-10}/CN_{10}$  values as a key parameter. The  $CN_{2.5-10}/CN_{10}$  values can be used to distinguish between newly  
42 formed particles and background particles events (Warren and Seinfeld, 1985; Covert et al., 1992; Humphries  
43 et al., 2015).  
44

45 For the identification of growth of nucleation mode particles, we cannot detect particle growth of particles less  
46 than 10 nm because only CN data and size distribution from 10 nm were available in this work. In this study,  
47 we considered particles smaller than 10 nm in diameter as newly formed particles, and for the calculation of  
48 growth we used SMPS data size distribution data ranging from 10 to 25 nm in diameter.  
49  
50

51 4. FR was estimated from CN data with 1 sec resolution in this study. What is values of variability? In general,  
52 1 sec CN data can be varied greatly. The large variability engender the large error of the estimated FR. CN data  
53 with longer time resolution (e.g., one minute) is better to estimate FR. Also, statistical analysis and error  
54 estimation are required for  $CN_{2.5-10}$  and the estimated FR.

1  
2 Authors' response: Because CN data with 1 s time resolution are highly fluctuating, , the FR in this study was  
3 estimated using average CN data per one minute.  
4

5  
6 To clarify we modified sentence to following text on Page 6 Line 2:

7 *"On the basis of the average number concentration data with 1 min time resolution, the FR was calculated for*  
8 *cases in which  $CN_{2.5-10}/CN_{10}$  values and  $CN_{2.5-10}$  concentrations sharply increased (Fig. S1 in the Supplement)"*  
9

10  
11 5. GR was estimated from GMD. How did you calculate GMD? Did you have log-normal fitting analysis or  
12 identify diameter of mode maximum? Some explanation is needed in Section of 2.2.3.  
13

14 Authors' response: GMD was calculated using log-normal fitting analysis.  
15

16 We added following text Page 6 Line 18:

17 *"Here, the GMD was calculated from log-normal fitting analysis."*  
18  
19

20 6. To identify origins and pathway of air masses with NPF, some trajectory was shown in Figure 1. Although  
21 trajectory can provide us important information of transport processes of air masses, Fig.1 showed only some  
22 cases. I suggest all trajectories in NPF at each height are plotted in Figure 1 (e.g., trajectory density map) to  
23 identify origins and pathway of air masses with NPF.  
24

25 Authors' response: In Figure 2, we showed example of the four cases with a steady air mass origin for each  
26 heights lasting during the NPF event periods, to highlight the fact that NPF cases were selected when steady air  
27 masses with similar origin. The origin of air masses arriving at the observation site during the NPF events (a  
28 total of 101 event days) was manually categorized into four cases by analyzing 48-h backward trajectory data  
29 ending at height of 100, 500 and 1500 m above the ground level. To comply the referee's suggestion, because  
30 2-days trajectories can't be classified in four cases based on our category method, 99-days backward trajectories  
31 in 101 NPF event days can be shown in Figure 2. This figure can be shown in the Supplement (Fig. S4).  
32  
33

34 We added this sentence Page 12 Line 7:

35 *"Each trajectory according to four cases can be shown in Fig. S4 in the Supplement."*  
36  
37  
38

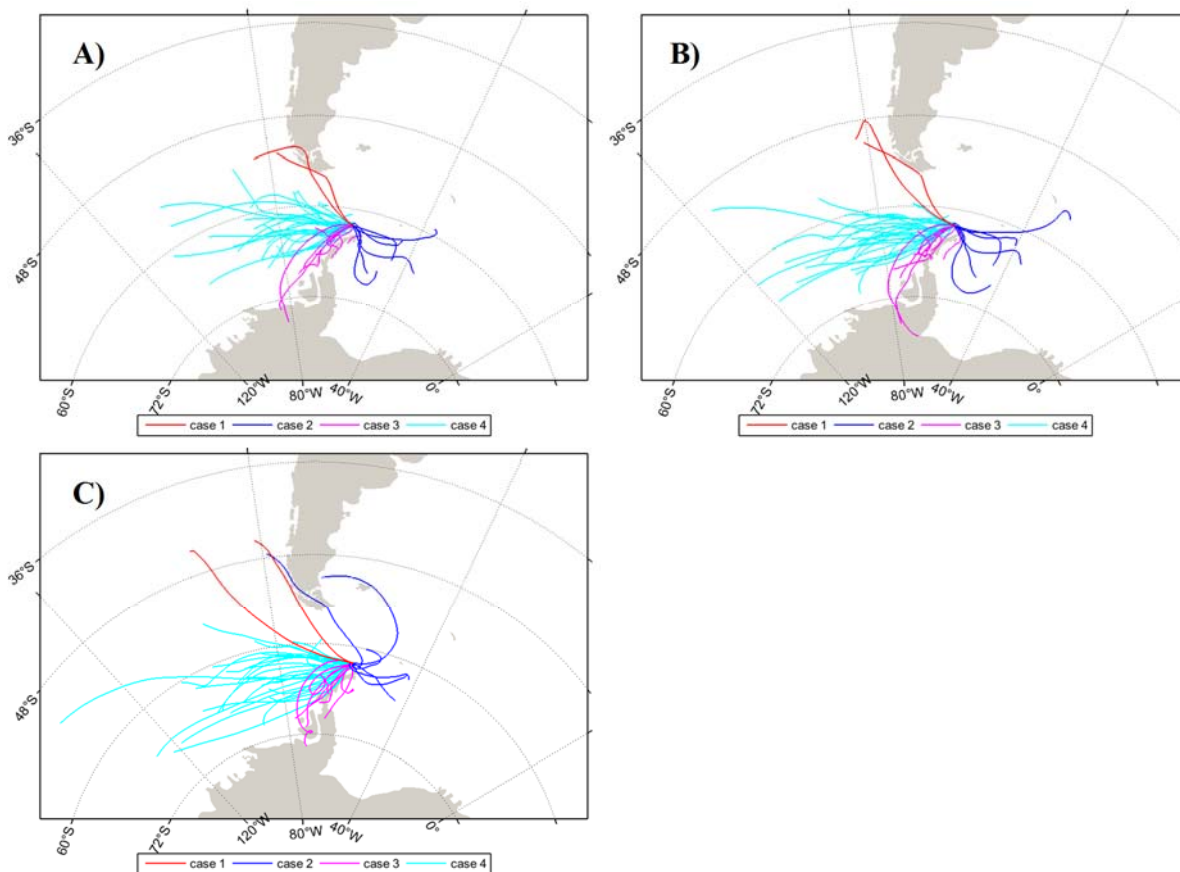

1  
2 Figure 2. 48-h air mass backward trajectories at height of (a) 100m, (b) 500 m and (c) 1500 m above the ground  
3 level of the sampling site. Because 2-day trajectories can't be classified in four cases based on category method  
4 in this study, 99-day trajectories were shown. Red, blue, pink and cyan colored line indicate that air masses  
5 originated from the South America area (Case I), Weddell Sea (Case II), Antarctic Peninsula area (Case III) and  
6 Bellingshausen Sea (Case IV), respectively.

7  
8 7. CCN concentrations were discussed in Section of 3.3. Long-term CCN records provide important knowledge  
9 to us. In this study, aerosol size distributions were measured simultaneously by SMPS. Nevertheless, aerosol  
10 size distributions did not compare to CCN data. I understand that critical diameter was estimated hardly in this  
11 study. However, aerosol size distributions must be useful and important data to elucidate features of CCN  
12 concentrations. The critical diameter of the Antarctic aerosols during summer was discussed by Kyrö et al.  
13 (2013). Comparison between size distributions and CCN should be shown and discussed.

14  
15 Authors' response: In previous studies (Pierce et al., 2014; Shen et al., 2016; Rose et al., 2017), the relationship  
16 between the NPF event and CCN concentration was determined by comparing number concentrations of  
17 particles larger than 50, 80 and 100 nm estimated by SMPS data are compared with aerosol size distribution  
18 data. In this study, whereas, CCN concentration measured directly by CCN counter were compared  
19 concentration of newly formed particles ( $CN_{2.5-10}$ ) as the function of time during NPF event periods. Since it  
20 was very rare when the all 3 instruments – CPCs, SMPS, and CCN counter – are running together with the very  
21 best condition during the particle burst event, authors decide to choose the best way available, comparing CPC  
22 data with CCN during the 34 days with two dataset are available. In this manuscript, authors want to show  
23 the results that the CCN concentration increase are noticed for a couple of hours following NPF event under clean  
24 Antarctic environment, and this results are derived directly from in-situ CCN measurements.

25  
26  
27 Minor points

28 1. Introduction: Page 2 Line 20 Aerosol particles with size larger than several tens nm are not "new".

1  
2 Authors' response: We removed "new" in text. (Page 2 Line 20).

3  
4  
5 2. Introduction: Page 3 Line 3 "Dall'osto" is correct.

6  
7 Authors' response: We corrected it.

8  
9  
10 3. Introduction: Page 3 Line 10-12 Asmi et al. (2010) presented hygroscopicity of ultrafine particles measured  
11 at the coastal Antarctic station (Aboa). They showed and discussed hygroscopic growth factor and CCN activity,  
12 although they did not measure directly CCN. This should be mentioned in introduction.

13  
14 Authors' response: We added following sentence in Page 3 Line 7:

15 *"Although CCN concentrations were indirectly estimated at Aboa, Asmi et al. (2010) also showed and discussed*  
16 *hygroscopic growth factor and CCN activity."*

17  
18  
19 4. Section 2.1 Measuring periods should be mentioned in Methods section, although the periods was shown in  
20 the section of Results and discussion.

21  
22 Authors' response: We added periods in Section 2.1.

23  
24  
25 5. Page 8 Line 14-18 Kyrö et al. (2013) showed emission of aerosol precursors from melt pond, not from oceanic  
26 bio-activity. This description should be modified. "\_biota activities in the Antarctica" is correct.

27  
28 Authors' response: We have replaced "*..... along with precursor vapors derived from marine biota activities in*  
29 *the Antarctica (Virkkula et al., 2009; Kyrö et al., 2013; Weller et al., 2015; Jang et al., 2018).*" to "*.... along*  
30 *with precursor vapors derived from marine biota activities in the Antarctica (Virkkula et al., 2009; Weller et*  
31 *al., 2015; Jang et al., 2018).*" (Page 9 Line 2)

32  
33  
34 6. Page 8 line 24-25 In this study, the NPF was observed in May in spite of only one case. If NPF occurred  
35 actually in the Antarctica in May, this is important to understand aerosol science in the Antarctic troposphere.  
36 Some explanation and discussion such as FR and air mass origin should be added.

37  
38 Authors' response: Monthly variations in the FR during the NPF event periods were compared in Figure 4(a).  
39 Because the NPF event was observed one case in May, explanation and discussion of result were omitted in this  
40 analysis. However, according to referee's suggestion, in the revised manuscript, we modified sentence on Page  
41 9 Line 10:

42  
43 *"Although the FR was  $0.20 \text{ cm}^{-3} \text{ s}^{-1}$  and air masses were probably originated from South America (Case I) in*  
44 *May, only one NPF event occurred."*

45  
46  
47 7. Figures 3 and 4 Both figures can be merged. That is easy to compare among each other.

48  
49 Authors' response: To compare monthly characteristic of the NPF events, it is right to merge both figures (3  
50 and 4). However, the way to estimate formation rate (FR) was different compared with estimation of growth  
51 rate (GR), condensation sink (CS) and source rate of condensable vapor (Q). The FR were calculated using CPC  
52 data, whereas the GR, CS and Q were estimated using SMPS data. To reduce confusion, authors used two  
53 figures. In the revised manuscript, however, we merge the two figures into one figure according to referee's  
54 opinion to easy compare among each other. In revised manuscript, we showed this figure as Figure 4.

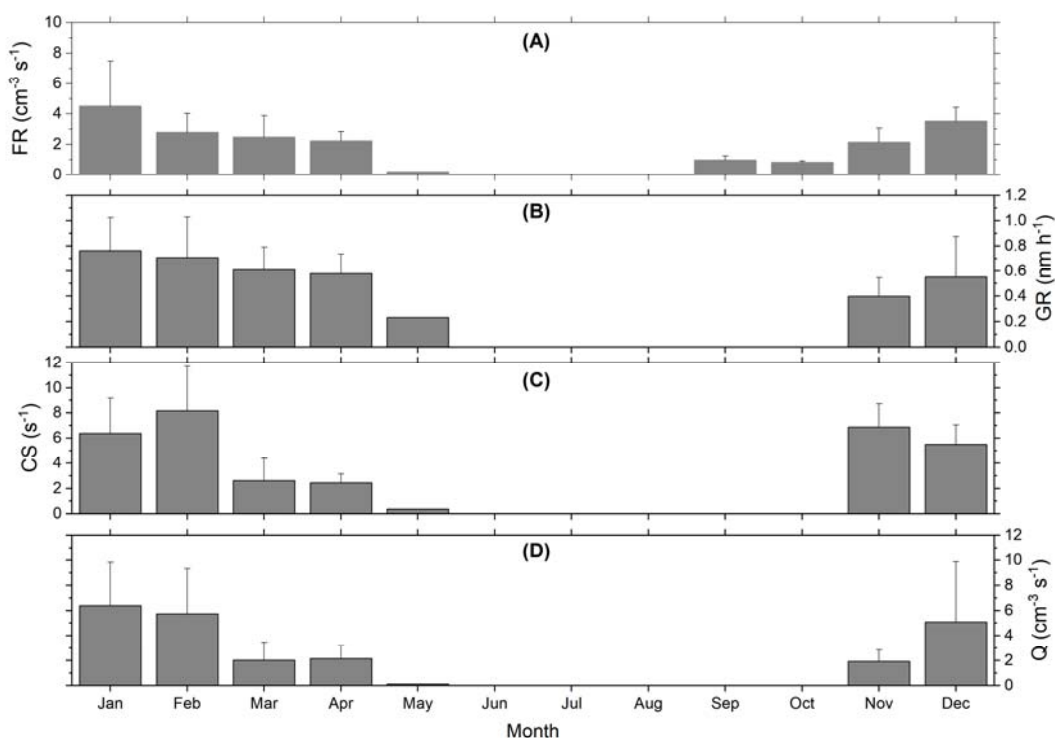

2  
3 Figure 3. Monthly variations of (a) the formation rates (FR), (b) the growth rates (GR) of nucleation mode  
4 particles ranging from 10 nm to 25 nm, (c) the condensation sink (CS), and (d) the source rate of condensable  
5 vapor (Q). The error bars represent a standard deviation.

6  
7  
8 8. Page 9 Line 22-24 GRs in September-October were not shown in Fig. 4. Does it mean no particle growth in  
9 September-October? Some explanation should be added.

10  
11 Authors' response: GR values were calculated using SMPS data as mentioned section of 2.2.3. Unfortunately,  
12 SMPS data were unreliable owing to trouble of an instruments in September and October during the NPF event  
13 periods. Thus, the GRs in September and October were not shown in the manuscript.

14  
15 We added following sentence in Page 10 Line 11:

16 *"The GRs in September and October were not shown due to mechanical trouble of the instruments."*

17  
18  
19 9. Page 10 Line 9-10 Higher CS values were obtained at King Sejong Station. The high CS might result from  
20 high aerosol number concentrations, although high CN related also to aerosol size distributions. If so (high  
21 aerosol concentrations), supply and transport of aerosols and aerosol precursors should be taken into account.  
22 This must be associated with FR, GR, and CCN ability. Details were already shown in the major comment.

23  
24 Authors' response: Authors agree with referee's opinion. Anthropogenic and local impact can have an effect on  
25 high aerosol number concentrations. In this study, we also measured black carbon concentrations using  
26 Aethalometer. Based on the black carbon data, results including anthropogenic and local impact were discarded  
27 during analysis. When the black carbon concentrations were higher than  $100 \text{ ng m}^{-3}$ , aerosol number  
28 concentration and CCN data were excluded from analysis. In addition, data for wind speed and direction were  
29 used to minimize anthropogenic and local impact. The northeastern direction ( $355\text{--}55^\circ$ ) is designated as a local  
30 pollution sector due to emissions from the power generator and crematory. Data collected from this wind  
31 direction are discarded. Besides, when wind speed was less than  $2 \text{ m s}^{-1}$ , all data were also removed.

1 10. Page 11 Line 19-22 Are air mass origins (Case I-IV) corresponding to Fig.1a-d?  
2

3 Authors' response: Yes, it is.  
4  
5

6 11. Section of 3.4 CS values were used for discussion. I suggest that CS values and aerosol number  
7 concentrations obtained in previous works at stations (e.g., Neumayer and Aboa) around Weddell Sea should be  
8 compared to data in this study. As mentioned in major comment, anthropogenic and local impact should be  
9 discussed. Such impacts are analyzed hardly only by trajectory.  
10

11 Authors' response: For referee's suggestion, we tried to compare aerosol concentrations with other stations (e.g.,  
12 Neumayer and Aboa) around Weddell Sea. However, it was difficult to compare the aerosol number  
13 concentrations due to limitation of data shown in papers. Weller et al. (2015) estimated CS values using light  
14 scattering data measured at Neumayer station and showed aerosol number concentrations during whole  
15 observation periods. In addition, Kyrö et al. (2013) introduced only median CS values during the entire  
16 campaign. As mentioned earlier in minor point 9, To minimize anthropogenic and local impact, in the present  
17 work, we used black carbon concentration, wind speed and wind direction data  
18  
19



# New particle formation observed at King Sejong Station, Antarctic Peninsula – Part 1: Physical characteristics and contribution to cloud condensation nuclei

Jaeseok Kim<sup>1,2</sup>, Young Jun Yoon<sup>1,\*</sup>, Yeontae Gim<sup>1</sup>, Jin Hee Choi<sup>1</sup>, Hyo Jin Kang<sup>1,3</sup>, Ki-Tae Park<sup>1</sup>, Jiyeon Park<sup>1</sup>, and Bang Yong Lee<sup>1</sup>

<sup>1</sup>Korea Polar Research Institute, 26 Songdomirae-ro, Yeonsu-gu, Incheon 21990, Republic of Korea

<sup>2</sup>Korea Research Institute of Standards and Science, 267 Gajeong-ro, Yuseong-gu, Daejeon 34113, Republic of Korea

<sup>3</sup>University of Science & Technology (UST), 217 Gajeong-ro, Yuseong-gu, Daejeon 34113, Republic of Korea

\*Correspondence to: Young Jun Yoon (yjyoon@kopri.re.kr)

## Abstract

The physical characteristics of aerosol particles during particle bursts observed at King Sejong Station in Antarctic Peninsula from March 2009 to December 2016 were analyzed. This study focuses on the seasonal variation in parameters related to particle formation such as the occurrence, formation rate (FR) and growth rate (GR), condensation sink (CS), and source rate of condensable vapor. The number concentrations during new particle formation (NPF) events varied from 1707 cm<sup>-3</sup> to 83120 cm<sup>-3</sup>, with an average of 20649 ± 9290 cm<sup>-3</sup>, and the duration of the NPF events ranged from 0.6 h to 14.4 h, with a mean of 4.6 ± 1.5 h. The NPF event dominantly occurred during austral summer period (~72%). The measured mean values of FR and GR of the aerosol particles were 2.79 ± 1.05 cm<sup>-3</sup> s<sup>-1</sup> and 0.68 ± 0.27 nm h<sup>-1</sup>, respectively showing enhanced rates in the summer season. The mean value of FR at King Sejong Station was higher than that at other sites in Antarctica, at 0.002-0.3 cm<sup>-3</sup> s<sup>-1</sup>, while those of growth rates was relatively similar results observed by precious studies, at 0.4~4.3 nm h<sup>-1</sup>. The derived average values of CS and source rate of condensable vapor were (6.04 ± 2.74) × 10<sup>-3</sup> s<sup>-1</sup> and (5.19 ± 3.51) × 10<sup>4</sup> cm<sup>-3</sup> s<sup>-1</sup>, respectively. The contribution of particle formation to cloud condensation nuclei (CCN) concentration was also investigated. The CCN concentration during the

1 NPF period increased approximately 9% compared with the background concentration. In addition,  
2 the effects of the origin and pathway of air masses on the characteristics of aerosol particles during a  
3 NPF event were determined. The FRs were similar regardless of the origin and pathway, whereas the  
4 GRs of particles originating from the Antarctic Peninsula and the Bellingshausen Sea, at  $0.77 \pm 0.25$   
5  $\text{nm h}^{-1}$  and  $0.76 \pm 0.30 \text{ nm h}^{-1}$ , respectively, were higher than those of particles originating from the  
6 Weddell Sea ( $0.41 \pm 0.15 \text{ nm h}^{-1}$ ).

7

## 8 **1. Introduction**

9 Understanding the effect of atmospheric aerosol particles on climate change is an important issue  
10 in atmospheric science. These particles are highly significant substances in the radiation transfer  
11 process in the atmosphere, with direct effects through scattering and absorption of solar radiation and  
12 indirect effects by acting as cloud condensation nuclei (CCN) for cloud droplets (Anttila et al., 2012).  
13 These particles also influence the properties and life time of clouds (Twomey, 1977; Albrecht, 1989).  
14 Although aerosol particles play an important role in global and regional climates, large uncertainties  
15 remain owing to a lack of knowledge on their formation and physicochemical characteristics (Carslaw  
16 et al., 2013; IPCC, 2013).

17 New particle formation (NPF) frequently occurs in the atmosphere and leads to enhancement of the  
18 total number concentrations of aerosol particles due to high numbers of nucleation mode particles  
19 (Spracklen et al., 2006; [Dall'Osto et al., 2017](#)). The modeling study of Pierce and Adams (2007)  
20 indicates that ultrafine particles of  $<100 \text{ nm}$  can contribute to maximum CCN generations of 40% and  
21 90% at the boundary layer and in the remote free troposphere, respectively. In order to understand the  
22 characteristics of the NPF, studies have been conducted in various regions including coastal, forest,  
23 mountainous, rural and urban sites (O'Dowd et al., 2002; Komppula et al., 2003; Kulmala et al., 2004;  
24 Yoon et al., 2006; Park et al., 2009; Kim et al., 2011; Rose et al., 2015; Bianchi et al., 2016; Kontkanen  
25 et al., 2017). In addition, studies on the NPF phenomenon have recently been conducted at various

1 sites in the polar regions (Asmi et al., 2010; Järvinen et al., 2013; Kyrö et al., 2013; Park et al., 2004;  
2 Weller et al., 2015; Humphries et al., 2016; Nguyen et al., 2016; Willis et al., 2016; Barbaro et al.,  
3 2017; Dall'Osto et al., 2017). A NPF event occurring in the period between December 1998 and  
4 December 2000 at the South Pole was reported by Park et al. (2004). Kyrö et al. (2013) showed that  
5 oxidized organics derived from the oxidation of biogenic precursors originating from local melting  
6 ponds might have contributed to particle growth at the Finnish research station Aboa (73.50°S,  
7 13.42°W). Although CCN concentrations were indirectly estimated at Aboa, Asmi et al. (2010) also  
8 showed and discussed hygroscopic growth factor and CCN activity. In addition, studies on the NPF  
9 were conducted at the Concordia station, Dome C (75.10°S, 123.38°E; Järvinen et al., 2013) and at the  
10 coastal Antarctic station Neumayer (70.65°S, 8.25°W; Weller et al., 2015). Although studies on NPF  
11 events have been conducted at various stations in the Antarctica, no results are available for the station  
12 in the Antarctic Peninsula. Also, the contribution of NPF to CCN concentration is not well understood  
13 in this area. Furthermore, results of the general long-term characteristics of aerosol particles during the  
14 period of NPF observation in Antarctica are rare compared with those in other continents.

15 In the present study, the frequency of NPF events was determined on the basis of total aerosol  
16 number concentration. We investigated the physical characteristics such as formation rate (FR) and  
17 growth rate (GR), condensation sink (CS) and source of condensation vapor as well as the seasonality  
18 of atmospheric aerosols during NPF events at King Sejong Station in the Antarctic Peninsula. The  
19 effect of particle formation on CCN concentrations was also examined. Furthermore, the air mass back  
20 trajectories were analyzed by using the Hybrid Single Particle Lagrangian Integrated Trajectory  
21 (HYSPLIT) model to understand physical properties of NPF events depending on the origins and  
22 pathway of the air masses.

23

## 24 **2. Methods**

### 25 **2.1. Site description and instrumentation**

1 The data analyzed in this study were obtained from March 2009 to December 2012 at the King  
2 Sejong station in the Antarctic Peninsula (62.22°S, 58.78°W). Further details on the sampling site as  
3 well as the instrumental specification and operation were introduced in the previous study (Kim et al.,  
4 2017). In brief, two condensation particle counters (CPCs; TSI 3776 and TSI 3772) were used to  
5 measure the total particle number concentrations. The aerosol size distributions of particles ranging  
6 from 10 to 300 nm were measured every 3 minutes with a scanning mobility particle sizer (SMPS)  
7 consisting of a differential mobility analyzer (DMA; HCT Inc., LDMA 4210) and a CPC (TSI 3772).  
8 The flow rate of sheath air and aerosol flow of DMA were 10 L min<sup>-1</sup> and 1 L min<sup>-1</sup>, respectively. The  
9 CCN concentrations were simultaneously measured by using a CCN counter (DMT CCN-100) with  
10 five different supersaturation values (i.e. 0.2, 0.4, 0.6, 0.8 and 1.0%). The sampling duration was set  
11 to be 5 minutes for each supersaturation value (except for 0.2%). For the 0.2% supersaturation value,  
12 the CCN concentration was measured for 10 min because of stability after measurements at 1%  
13 supersaturation value. In the present work, only results of CCN concentration for a 0.4%  
14 supersaturation value were used. In addition, meteorological parameters including temperature,  
15 relative humidity, wind speed, wind direction, pressure, and solar radiation intensity were continuously  
16 monitored by using an automatic weather station (AWS; Vaisala HMP45 for measuring temperature  
17 and relative humidity, WeatherTronics 2102 for measuring wind speed and direction, WeatherTronics  
18 7100 for measuring pressure and Eppley Precision Spectral Pyranometer PSP for measuring solar  
19 radiation intensity) system.

## 20 21 **2.2. Data analysis**

22 To ensure data quality, raw data measured during the following conditions were discarded: (i) wind  
23 direction between 355° and 55° (local pollution sector) (ii) concentration of black carbon higher than  
24 100 ng m<sup>-3</sup>, (iii) wind speed less than 2 m s<sup>-1</sup> and (iv) instrument malfunction based on the log-book.  
25 If valid data for one day were less than 50% after discarding the raw data, such days were excluded.

1 The acquisition rate for each instrument is summarized in Table 1. Here, the acquisition rate indicates  
2 the value of the analyzed days divided by the total measurement days. Because the acquisition rate  
3 from the SMPS was lower than that of the CPC in this study, the value difference between the  
4 concentrations of particles larger than 2.5 nm ( $CN_{2.5}$ ) and 10 nm ( $CN_{10}$ ) observed from two CPCs was  
5 used to identify the NPF events.

### 6 7 **2.2.1. Definition of NPF events**

8 As mentioned in the previous section, the **difference** between  $CN_{2.5}$  and  $CN_{10}$  concentrations were  
9 used to define days for NPF events or non-NPF events (Yoon et al., 2006). **The  $CN_{2.5-10}$  represents** the  
10 number concentrations of newly formed particles produced from gas-to-particle conversion. The NPF  
11 days were defined in this study according to the following conditions: (i) The  $CN_{2.5-10}$  is higher than  
12  $500 \text{ cm}^{-3}$  (ii) the  $CN_{2.5-10}/CN_{10}$  ratio is higher than 10 and (iii) the NPF duration is longer than 30 min.  
13 **The  $CN_{2.5-10}/CN_{10}$  ratio** is the parameter used to distinguish between particles newly formed from gas-  
14 to-particle conversion and background particles (Warren and Seinfeld, 1985; Humphries et al., 2015).  
15 Humphries et al. (2016) also used the  $CN_{2.5-10}/CN_{10}$  ratio to distinguish the NPF days during a 52 days'  
16 voyage in the East Antarctic sea ice region because the number concentration data were more reliable  
17 than the size distribution data.

### 18 19 **2.2.2. Classification of NPF events using SMPS data**

20 After identification of the NPF event days, classification of the NPF events was conducted by using  
21 size distributions from a SMPS. The NPF events were classified into three types of A, B and C  
22 according to the classification by Dal Maso et al. (2005) and Yli-Juuti et al. (2009) as shown in Fig. 1.  
23 Type A describes days in which the formation and growth of particles were clear. Type B describes  
24 days in which the formation occurred but growth was not clear. Type C describes days in which the  
25 event occurrence was not distinct.

26

### 2.2.3. Estimation of parameters for NPF characteristics

On the basis of the average number concentration data with 1 min time resolution, the FR was calculated for cases in which  $CN_{2.5-10}/CN_{10}$  values and  $CN_{2.5-10}$  concentrations sharply increased (Fig. S1 in the Supplement). The FR of new particles ranging from 2.5 nm to 10 nm was determined according to variation in the number concentrations of  $CN_{2.5-10}$  based on the following equation (Dal Maso et al., 2005):

$$FR = \frac{dN_{nuc}}{dt} + F_{coag} + F_{growth} \quad (1)$$

Here,  $N_{nuc}$  is the particle number concentrations of nucleation mode. In this study, the  $CN_{2.5-10}$  concentrations obtained by two particle counters were used for the term  $N_{nuc}$ .  $F_{coag}$  is the particle loss in accordance with coagulation, and  $F_{growth}$  represents the flux of particles growing from the nucleation mode. Because the  $CN_{2.5-10}$  concentrations were predominant in the total number concentration and the particles rarely grew over the nucleation mode during the formation period, the  $F_{coag}$  and  $F_{growth}$  terms in Eq. 1 were neglected in this study (Dal Maso et al., 2005; Shen et al., 2016).

The GRs were calculated by using the size distributions measured by a SMPS. Based on the hourly mean aerosol size distribution data, the geometric mean diameter (GMD) of particles which is limited to the size range of 10-25 nm was used. Here, the GMD was calculated from log-normal fitting analysis. According to these method, growth rate of particles ranging from 10-25 nm was estimated regardless of the NPF event types (Fig. S2 in the Supplement). The GR was determined by rate of change in the GMD by using the following equation (Kulmala et al., 2004; Dal Maso et al., 2005):

$$GR = \frac{dD_p}{dt} \quad (2)$$

The CS is an important parameter governing the NPF because it indicates the loss rate in which gaseous molecules condense onto pre-existing aerosols. It can be estimated from the size distribution

1 data according to the following equation (Dal Maso et al., 2005; Kulmala et al., 2005; Shen et al.,  
2 2016):

$$CS = 2\pi D \sum_{dp} \beta_m d_p N_{dp} \quad (3)$$

3  
4  
5 where  $D$  is the diffusion coefficient of the condensable vapor,  $\beta$  is the transitional regime correction  
6 factor from Fuchs and Sutugin (1970), and  $d_p$  and  $N_{dp}$  are the particle size and number concentration,  
7 respectively. It is assumed that condensable vapor is gaseous sulfuric acid which has been reported to  
8 play an important role in the nucleation process (Dal Maso et al., 2005).

10 According to the GR and the CS, it is possible to estimate condensable vapor concentration,  $C_v$  (unit:  
11 molecules  $\text{cm}^{-3}$ ) and its source rate,  $Q$  (unit: molecules  $\text{cm}^{-3} \text{ s}^{-1}$ ; Kulmala et al., 2001; Dal Maso, 2002),  
12 assuming that the particle growth is caused by condensation of a low volatile vapor to the particle  
13 surface. In the nucleation mode, the relationship between  $C_v$  and GR is estimated by the following  
14 equation:

$$C_v = A \times GR \quad (4)$$

15  
16  
17 where  $A$  is a constant, specifically  $1.37 \times 10^7 \text{ h cm}^{-3}$  for a vapor with the molecular properties of sulfuric  
18 acid. It assumed that  $C_v$  is constant during the growth process.

20 Assuming no other sink terms for the condensing vapor, source rate of condensable vapor is  
21 estimated under the steady-state condition:

$$Q = CS \times C_v \quad (5)$$

### 24 25 **2.3. Backward trajectory analysis**

26 To understand characteristics of NPF events depending on the origin and pathway of air masses, air  
27 mass backward trajectory analysis was performed by using the HYSPLIT model (Stein et al., 2015;

1 <http://www.arl.noaa.gov/HYSPLIT.php>). The origin of air masses arriving at the observation site  
2 during the NPF events (a total of 101 event days) was manually categorized into four cases by  
3 analyzing 48-h backward trajectory data ending at height of 100, 500 and 1500 m above the ground  
4 level. The results with similar air mass origins and pathways during the NPF event periods at three  
5 different heights were used for the analysis in this study, as shown in Fig. 2. Accordingly, the air mass  
6 was categorized into four cases according to its origin and pathway: two affected continents including  
7 South America (Case I) and the Antarctic Peninsula (Case III) and two affected marine cases including  
8 the Weddell (Case II) and Bellingshausen Sea (Case IV).

9

### 10 **3. Results and discussion**

#### 11 **3.1 Characteristics of the NPF events**

##### 12 **3.1.1 Occurrence frequency and FR of NPF events**

13 After data screening as mentioned in the previous section, 1655-days of data recorded during the  
14 observation periods from March 2009 to December 2016 were analyzed. The data including valid data  
15 were classified into two groups, NPF event days and non-event days, by using CN<sub>2.5-10</sub> concentrations  
16 measured by two CPCs. The duration of the NPF ranged from 0.6 to 14.4 h, with a mean of  $4.6 \pm 1.5$   
17 h. Only 6.1% (101 days) of the results were defined as NPF events, whereas 93.9% (1554 days) were  
18 classified as the non-NPF events (Table 2). This NPF frequency at King Sejong Station in the Antarctic  
19 Peninsula is quite low compared with those in previous studies at other mid-latitude sites (Kulmala et  
20 al., 2004; Dal Maso et al., 2005; Pierce et al., 2014; Rose et al., 2015); comparison with other sites in  
21 the Antarctic is difficult owing to the lack of long-term observed results. In addition, the monthly  
22 variation of the NPF frequency was compared as shown in Fig. 3. It is clear that the NPF number was  
23 highest during the austral summer, from December to February, whereas non-events were observed in  
24 the austral winter period from June to August. Approximately 72% of the NPF occurred during the  
25 summer period, showing the highest value of 38% in January. The clear difference in the frequency of



1 the NPF events in austral summer and winter periods indicates that solar intensity and temperature  
2 play important roles in the formation and growth of aerosol particles, along with precursor vapors  
3 derived from marine biota activities in the Antarctica (Virkkula et al., 2009; Weller et al., 2015; Jang  
4 et al., 2018).

5 The FR of particles ranging from 2.5 nm to 10 nm varied from 0.16 to 9.88  $\text{cm}^{-3} \text{s}^{-1}$ , with an average  
6 of  $2.79 \pm 1.05 \text{ cm}^{-3} \text{ s}^{-1}$ . Fig.4(a) shows the monthly variations in the FR over whole observation periods.  
7 The seasonal trend in the FR shows a pattern similar to that of the NPF events frequency. The FRs  
8 were the highest during the austral summer (December-February,  $3.20 \pm 1.09 \text{ cm}^{-3} \text{ s}^{-1}$ ). Those in the  
9 austral autumn period (March-May,  $1.71 \pm 0.56 \text{ cm}^{-3} \text{ s}^{-1}$ ) were similar to those of the spring period  
10 (September-November,  $1.71 \pm 0.79 \text{ cm}^{-3} \text{ s}^{-1}$ ). Although the FR was  $0.20 \text{ cm}^{-3} \text{ s}^{-1}$  and air masses were  
11 originated from South America (Case I) in May, only one NPF event occurred. In particular, the  
12 monthly maximum FR in December and the minimum in October were  $3.52 \text{ cm}^{-3} \text{ s}^{-1}$  and  $0.84 \text{ cm}^{-3} \text{ s}^{-1}$ ,  
13 respectively. The FR measured at various stations in the Antarctic and other continents are  
14 summarized in Table 3. The average level of the FR observed in this study was more than 10 times  
15 higher than that of other stations in Antarctica. Although it is difficult to directly explain the causes of  
16 the higher FR, it is likely that the method used in this study to derive the FR influenced the results.  
17 The FRs were estimated in the previous studies on the basis of the size distribution data with few  
18 minute time resolution, whereas the FR in this study was calculated by using the variation in total  
19 number concentration ( $\text{CN}_{2.5-10}$ ) data with a time resolution of 1 s. Another possible reason is the  
20 location. As shown in Table 3, the FR at a coastal region, specifically Mace Head located  
21 approximately 500 m from the coast, is higher than that reported at other sites due to the high biological  
22 activity of marine algae, which produce gaseous precursors from tidal zone and open oceans. Previous  
23 modeling research showed that the dimethyl sulfide emission in the Antarctic Peninsula during the  
24 astral summer period is higher than that in other regions in Antarctica (Yu and Luo, 2010). Thus, the  
25 characteristics of the sampling site might have caused the FR to be higher than that at other site in

1 Antarctica.

2  
3 **3.1.2 Calculation of other parameters based on size distribution data**

4 On the basis of the size distribution results measured with a SMPS, NPF events were categorized  
5 into three NPF types, as mentioned as Sect. 2.2.2. Type C was dominant, as shown in Table 4; among  
6 all NPF event days, only two days (2.0%) were considered as Type A events. The GRs of nucleation  
7 mode particles ranged between  $0.02 \text{ nm h}^{-1}$  and  $3.09 \text{ nm h}^{-1}$ , with a mean of  $0.68 \pm 0.27 \text{ nm h}^{-1}$ . Fig.  
8 4(b) presents the monthly variation in the GR from March 2009 to December 2016. A seasonal trend  
9 in the GR is apparent, in which the maximum occurred in the summer. The GR gradually began to  
10 decrease in February and increase again in November, as shown in Fig. 4(b). The GR in January was  
11  $0.76 \pm 0.26 \text{ nm h}^{-1}$ , whereas that in November was  $0.40 \pm 0.15 \text{ nm h}^{-1}$ . [The GRs in September and](#)  
12 [October were not shown due to mechanical trouble of the instruments.](#) The GR in this study is similar  
13 to the values reported in previous studies conducted in Antarctica. For instance, Weller et al. (2015)  
14 reported that the GR at the Neumayer station varied between  $0.4$  and  $1.9 \text{ nm h}^{-1}$ , with an average of  
15  $0.90 \pm 0.46 \text{ nm h}^{-1}$ . However, our results are lower than those reported by Järvinen et al. (2013), who  
16 studied NPF events at Concordia station, Dome C from December 2007 to November 2009 and showed  
17 a GR of  $4.3 \text{ nm h}^{-1}$ . This discrepancy is likely attributed to the number of analyzed days. In the present  
18 study, we analyzed 86 of 101 NPF days, whereas the previous study analyzed 15 NPF days.

19 Fig. 4(c) shows a monthly variation in CS during NPF events. The CS varied from  $0.02 \times 10^{-3} \text{ s}^{-1}$   
20 to  $25.66 \times 10^{-3} \text{ s}^{-1}$ , with an average of  $(6.04 \pm 2.74) \times 10^{-3} \text{ s}^{-1}$ . The value was high in February ( $(8.17 \pm$   
21  $3.55) \times 10^{-3} \text{ s}^{-1}$ ) and a low in April ( $(2.44 \pm 0.70) \times 10^{-3} \text{ s}^{-1}$ ), as shown in Fig. 4(c). The CS measured  
22 in this study was approximately 5-10 times higher than that observed at the other Antarctic station.  
23 Weller et al. (2015), who estimated the CS using light scattering data measured from Neumayer station,  
24 indicated a CS value of about  $10^{-3} \text{ s}^{-1}$ . A median CS value of  $4.0 \times 10^{-4} \text{ s}^{-1}$  in a 47-day observation period  
25 at Aboa station was reported by Kyrö et al. (2013). Järvinen et al. (2013) also showed a CS value of

1  $1.8 \times 10^{-4} \text{ s}^{-1}$  using data of 15 days.

2 The monthly variation in the condensable vapor source rate during an NPF event is displayed in  
3 Fig. 4(d). The source rates derived were between  $0.03 \times 10^3$  and  $3.74 \times 10^5 \text{ cm}^{-3} \text{ s}^{-1}$ , with a mean source  
4 rate of  $(5.19 \pm 3.51) \times 10^4 \text{ cm}^{-3} \text{ s}^{-1}$ . The source rate of condensable vapor was maximum during the  
5 austral summer months. In particular, the maximum and minimum average values of the source rate  
6 were  $(6.40 \pm 3.43) \times 10^4 \text{ cm}^{-3} \text{ s}^{-1}$  in January and  $(1.93 \pm 0.92) \times 10^4 \text{ cm}^{-3} \text{ s}^{-1}$  in November, respectively.  
7 This source rate was higher than that measured at a coastal Antarctic station. Kulmala et al. (2005)  
8 reported that the value of source rate varied from  $0.9 \times 10^3 \text{ cm}^{-3} \text{ s}^{-1}$  to  $2.0 \times 10^4 \text{ cm}^{-3} \text{ s}^{-1}$  at the Aboa station.

### 9 10 **3.3 CCN concentration during NPF events**

11 In this section, the contribution of particle formation to the variation in CCN concentration is  
12 investigated. Although recent studies reported that number concentrations of climate-relevant particles  
13 increased during NPF events (Pierce et al., 2014; Shen et al., 2016; Rose et al., 2017), the contribution  
14 of NPF to CCN concentration was estimated by using an indirect method. The number concentrations  
15 of particles larger than 50, 80 and 100 nm were estimated by using size distribution data. That value  
16 was considered as potential CCN concentration at different supersaturation value. In this study,  
17 however, CCN concentrations at a supersaturation value of 0.4% were directly measured by CCN  
18 counter. Hourly mean CCN concentrations were compared with CN concentrations and size  
19 distribution results (Fig S3 in the Supplement). Data for only 34 days out of 101 NPF days were valid  
20 due to the CCN data availability limited by the mechanical malfunctioning of the instrument. Fig. 5  
21 shows variation in normalized values of  $\text{CN}_{2.5-10}$  and CCN concentrations as a function of time during  
22 the NPF event periods. The normalized value was calculated from  $\text{CN}_{2.5}$  and the CCN concentration  
23 at each time divided by the concentration recorded 1 h prior to the NPF event. The zero in the x-axis  
24 in the figure represents the start time of the NPF event. The  $\text{CN}_{2.5-10}$  concentrations sharply increased  
25 at NPF start time and the peak concentration occurred 2 h afterward, as shown in Fig. 5. Moreover, the

1 CCN concentrations gradually increased for 9 h. Indeed, the maximum CCN concentrations rose from  
2  $170.7 \pm 38.6 \text{ cm}^{-3}$  to  $185.6 \pm 44.6 \text{ cm}^{-3}$  during and after the NPF events, respectively, showing an increase  
3 of 9%.

#### 4 5 **3.4 Effects of air mass origin on NPF events**

6 The effects of air mass origin on the NPF characteristics were also investigated by 48-h air mass  
7 back trajectory analysis. Each trajectory according to four cases can be shown in Fig. S4 in the  
8 Supplement. The frequencies of NPF, FR, GR, CS, and the source rate of condensable vapor over the  
9 whole observation period are listed in Table 5. Here, the analysis results of the NPF characteristics of  
10 air masses originating from South America (Case I) are not shown owing to low frequencies. The air  
11 masses originating from the sea (Case II and IV) were dominant during NPF event at King Sejong  
12 Station. The FRs were analogous regardless of the air mass origin and pathway, while the GR of Case  
13 III and Case IV was significantly higher than those of Case II. The lower GR should be related to the  
14 CS and the source rate of condensable vapor. In the case of the air mass originating from the Weddell  
15 Sea (Case II), the CS was higher than that of other cases, whereas the source rate of condensing vapor  
16 was lowest. The higher CS and lower source rate might indicate a decline in condensing vapor and  
17 hence a decrease in GR. Our results for the source rate of condensable vapor agree with those of a  
18 previous study by Yu and Luo (2010), discussing the role of dimethyl sulfide (DMS) emission in the  
19 NPF process in remote oceans. In their model study, the concentrations of DMS and sulfuric acid in  
20 the Bellingshausen Sea and the Antarctic Peninsula area during the austral summer season were higher  
21 than those in Weddell Sea region. In satellite-derived estimates of the biological activities, DMS  
22 produced from phytoplankton was found to be more dominant in the Bellingshausen Sea than in the  
23 Weddell Sea (Jang et al., 2018). Sulfuric acid is derived from oxidation of DMS emitted from oceans  
24 (Virkkula et al., 2009). In this study, the condensable vapor was assumed to be sulfuric acid in the  
25 source rate calculations, as mentioned in Sect. 2.2.3.

1 Fig. 6 shows a comparison of the NPF characteristics depending on the origin and pathway of the  
2 air mass during the summer season. The mean CS value was high. However, in case of the air mass  
3 originating from the Bellingshausen Sea (Case IV), the GR was relatively higher than the values of air  
4 masses originated from other region. The mean value of this source rate for the air mass originating  
5 from the Weddell Sea (Case II) was similar to that from the Antarctic Peninsula (Case III), while the  
6 CS mean value was 1.7 times higher. This resulted in a low GR.

7 For air mass originating from the Bellingshausen Sea (Case IV), the seasonal properties of the  
8 parameters related to the NPF events were analyzed. As shown in Fig. 7, the mean values of FR, GR  
9 and the source rate of condensable vapor were highest during the austral summer periods. However,  
10 mean values of CS were highest during the spring period.

11

#### 12 **4. Summary**

13 In this study, the characteristics of NPF at King Sejong station in Antarctic Peninsula were  
14 investigated using a data set of eight years from March 2009 to December 2016, of total particle  
15 number concentrations and particle size distributions. The frequencies of NPF events and FR were  
16 obtained by using the data of total number concentrations, whereas GR, CS and the source rate of  
17 condensable vapor were calculated from the aerosol size distribution results. A low occurrence  
18 frequency of NPF events, at 6%, was observed, and most of the NPF events occurred during the austral  
19 summer. No NPF events were observed during the winter due to lower solar radiation and a lack of  
20 precursors for particle formation. The mean values of the FR and GR were  $2.79 \pm 1.05 \text{ cm}^{-3} \text{ s}^{-1}$  and  
21  $0.68 \pm 0.27 \text{ nm h}^{-1}$ , respectively. These results show that the FR at King Sejong Station as higher than  
22 that at other Antarctica sites, whereas the GR was relatively similar to values reported in previous  
23 studies conducted in the Antarctic. A possible reason for the lower GR can be attributed to the CS,  
24 which was 5-10 times higher than that reported at other stations in Antarctica. This observation  
25 suggests that condensable vapor contributed to growth of nucleated nanoparticles and may have

1 condensed onto pre-existing particles, hence decreasing the GR. According to 48-h backward  
2 trajectory analysis, air masses originating from oceanic areas were dominant during the NPF events.  
3 In order to investigate the contribution of the NPF events to variation in CCN concentrations at a  
4 supersaturation value of 0.4%, the CCN concentrations were compared with the CN<sub>2.5-10</sub>  
5 concentrations as a function of time. The results showed that the CCN concentrations during and after  
6 the NPF events increased approximately 9% compared with those measured before the event. This  
7 study is the first to report the characteristics of NPF in the Antarctic Peninsula. However, further  
8 research is need to understand the chemical characteristics of aerosol particles and the chemical  
9 composition of precursors during NPF events to fully understand the NPF for this region.

10

11 **Author contributions**

12 JK and YJY designed the study, YG, JHC, HJK, KTP, JP, and BYL analysed aerosol data. JK and  
13 YJY prepared the manuscript with contributions from all co-authors.

14

15 **Acknowledgements**

16 We would like to thank the many technicians and scientists of the overwintering crews. This work was  
17 supported by the KOPRI project (PE19010) and a Korea Grant from the Korean Government (MSIP)  
18 (NRF-2016M1A5A1901769) (KOPRI-PN19081).

19

20 **References**

21 Albrecht, B. A.: Aerosols, cloud microphysics, and fractional cloudiness, *Science*, 245, 1227-1230,  
22 10.1126/science.245.4923.1227, 1989.  
23 Anttila, T., Brus, D., Jaatinen, A., Hyvärinen, A.-P., Kivekäs, N., Romakkaniemi, S., Komppula, M.,  
24 and Lihavainen, H.: Relationships between particles, cloud condensation nuclei and cloud droplet  
25 activation during the third Pallas Cloud Experiment, *Atmos. Chem. Phys.*, 12, 11435–11450,  
26 <https://doi.org/10.5194/acp-12-11435-2012>, 2012.  
27 Asmi, E., Frey, A., Virkkula, A., Ehn, M., Manninen, H. E., Timonen, H., Tolonen-Kivimäki, O.,  
28 Aurela, M., Hillamo, R., and Kulmala, M.: Hygroscopicity and chemical composition of antarctic  
29 sub-micrometre aerosol particles and observations of new particle formation, *Atmos. Chem. Phys.*,  
30 10, 4253-4271, 10.5194/acp-10-4253-2010, 2010.

- 1 Barbaro, E., Padoan, S., Kirchgeorg, T., Zangrando, R., Toscano, G., Barbante, C., and Gambaro, A.:  
2 Particle size distribution of inorganic and organic ions in coastal and inland Antarctic aerosol,  
3 *Environ. Sci. Pollut. Res.*, 24, 2724-2733, 10.1007/s11356-016-8042-x, 2017.
- 4 Bianchi, F., Tröstl, J., Junninen, H., Frege, C., Henne, S., Hoyle, C. R., Molteni, U., Herrmann, E.,  
5 Adamov, A., Bukowiecki, N., Chen, X., Duplissy, J., Gysel, M., Hutterli, M., Kangasluoma, J.,  
6 Kontkanen, J., Kürten, A., Manninen, H. E., Münch, S., Peräkylä, O., Petäjä, T., Rondo, L.,  
7 Williamson, C., Weingartner, E., Curtius, J., Worsnop, D. R., Kulmala, M., Dommen, J., and  
8 Baltensperger, U.: New particle formation in the free troposphere: A question of chemistry and  
9 timing, *Science*, 352, 1109-1112, 10.1126/science.aad5456, 2016.
- 10 Carslaw, K. S., Lee, L. A., Reddington, C. L., Pringle, K. J., Rap, A., Forster, P. M., Mann, G. W.,  
11 Spracklen, D. V., Woodhouse, M. T., Regayre, L. A., and Pierce, J. R.: Large contribution of natural  
12 aerosols to uncertainty in indirect forcing, *Nature*, 503, 67-71, 10.1038/nature12674, 2013.
- 13 Dal Maso, M.: Condensation and coagulation sinks and formation of nucleation mode particles in  
14 coastal and boreal forest boundary layers, *J. Geophys. Res.*, 107, 10.1029/2001jd001053, 2002.
- 15 Dal Maso, M., Kulmala, M., Riipinen, I., Wagner, R., Hussein, T., Aalto, P. P., and Lehtinen, K. E. J.:  
16 Formation and growth of fresh atmospheric aerosols: Eight years of aerosol size distribution data  
17 from SMEAR II, Hyytiälä, Finland, *Boreal Environ. Res.*, 10, 323-336, 2005.
- 18 Dall'Osto, M., Beddows, D. C. S., Tunved, P., Krejci, R., Ström, J., Hansson, H. C., Yoon, Y. J., Park,  
19 K. T., Becagli, S., Udisti, R., Onasch, T., Ódowd, C. D., Simó, R., and Harrison, R. M.: Arctic sea  
20 ice melt leads to atmospheric new particle formation, *Sci. Rep.*, 7, 10.1038/s41598-017-03328-1,  
21 2017.
- 22 Fuchs, N. A., and Sutugin, A. G.: Highly Dispersed Aerosols, Ann Arbor Science Publ., Ann Arbor,  
23 Michigan, 1970.
- 24 Grenfell, J. L., Harrison, R. M., Allen, A. G., Shi, J. P., Penkett, S. A., O'Dowd, C. D., Smith, M. H.,  
25 Hill, M. K., Robertson, L., Hewitt, C. N., Davison, B., Lewis, A. C., Creasey, D. J., Heard, D. E.,  
26 Hebestreit, K., Aliche, B., and James, J.: An analysis of rapid increases in condensation nuclei  
27 concentrations at a remote coastal site in western Ireland, *J. Geophys. Res.: Atmos.*, 104, 13771-  
28 13780, 1999.
- 29 Humphries, R. S., Schofield, R., Keywood, M. D., Ward, J., Pierce, J. R., Gionfriddo, C. M., Tate, M.  
30 T., Krabbenhoft, D. P., Galbally, I. E., Molloy, S. B., Klekociuk, A. R., Johnston, P. V., Kreher, K.,  
31 Thomas, A. J., Robinson, A. D., Harris, N. R. P., Johnson, R., and Wilson, S. R.: Boundary layer  
32 new particle formation over East Antarctic sea ice - Possible Hg-driven nucleation?, *Atmos. Chem.*  
33 *Phys.*, 15, 13339-13364, 10.5194/acp-15-13339-2015, 2015.
- 34 Humphries, R. S., Klekociuk, A. R., Schofield, R., Keywood, M. D., Ward, J., and Wilson, S. R.:  
35 Unexpectedly high ultrafine aerosol concentrations above East Antarctic sea ice, *Atmos. Chem.*  
36 *Phys.*, 16, 2185-2206, 10.5194/acp-16-2185-2016, 2016.
- 37 Jang, E., Park, K.-T., Yoon, Y. J., Kim, T.-W., Hong, S.-B., Becagli, S., Traversi, R., Kim, J., and Gim,  
38 Y.: New particle formation events observed at the King Sejong Station, Antarctic Peninsula – Part  
39 2: Link with the oceanic biological activities, Manuscript submitted for publication, 2018.
- 40 IPCC: Climate change 2013: The physical science basis, Intergovernmental panel on Climate Change,  
41 Cambridge University Press, New York, USA, 571-740, 2013.
- 42 Ito, T.: Size distribution of Antarctic submicron aerosols, *Tellus Ser. B*, 45 B, 145-159, 1993.
- 43 Järvinen, E., Virkkula, A., Nieminen, T., Aalto, P. P., Asmi, E., Lanconelli, C., Busetto, M., Lupi, A.,

- 1 Schioppo, R., Vitale, V., Mazzola, M., Petäjä, T., Kerminen, V. M., and Kulmala, M.: Seasonal  
2 cycle and modal structure of particle number size distribution at Dome C, Antarctica, *Atmos. Chem.*  
3 *Phys.*, 13, 7473-7487, 10.5194/acp-13-7473-2013, 2013.
- 4 Keil, A., and Wendisch, M.: Bursts of Aitken mode and ultrafine particles observed at the top of  
5 continental boundary layer clouds, *J. Aerosol. Sci.*, 32, 649-660, 10.1016/s0021-8502(00)00102-6,  
6 2001.
- 7 Kim, J., Yoon, Y. J., Gim, Y., Kang, H. J., Choi, J. H., Park, K.-T., and Lee, B. Y.: Seasonal variations  
8 in physical characteristics of aerosol particles at the King Sejong Station, Antarctic Peninsula,  
9 *Atmos. Chem. Phys.*, 17, 12985-12999, 10.5194/acp-17-12985-2017, 2017.
- 10 Kim, J. S., Kim, Y. J., and Park, K.: Measurements of hygroscopicity and volatility of atmospheric  
11 ultrafine particles in the rural Pearl River Delta area of China, *Atmos. Environ.*, 45, 4661-4670,  
12 2011.
- 13 Komppula, M., Lihavainen, H., Hatakka, J., Paatero, J., Aalto, P., Kulmala, M., and Viisanen, Y.:  
14 Observations of new particle formation and size distributions at two different heights and  
15 surroundings in subarctic area in northern Finland, *J. Geophys. Res. D: Atmos.*, 108, AAC 12-11  
16 AAC 12-11, 2003.
- 17 Kontkanen, J., Lehtipalo, K., Ahonen, L., Kangasluoma, J., Manninen, H. E., Hakala, J., Rose, C.,  
18 Sellegri, K., Xiao, S., Wang, L., Qi, X., Nie, W., Ding, A., Yu, H., Lee, S., Kerminen, V. M., Petäjä,  
19 T., and Kulmala, M.: Measurements of sub-3nm particles using a particle size magnifier in different  
20 environments: From clean mountain top to polluted megacities, *Atmos. Chem. Phys.*, 17, 2163-  
21 2187, 10.5194/acp-17-2163-2017, 2017.
- 22 Kulmala, M., Dal Maso, M., Mäkelä, J. M., Pirjola, L., Väkevä, M., Aalto, P., Miikkulainen, P., Hämeri,  
23 K., and O'Dowd, C. D.: On the formation, growth and composition of nucleation mode particles,  
24 *Tellus Ser. B*, 53, 479-490, 2001.
- 25 Kulmala, M., Vehkamäki, H., Petäjä, T., Dal Maso, M., Lauri, A., Kerminen, V. M., Birmili, W., and  
26 McMurry, P. H.: Formation and growth rates of ultrafine atmospheric particles: A review of  
27 observations, *J. Aerosol. Sci.*, 35, 143-176, 10.1016/j.jaerosci.2003.10.003, 2004.
- 28 Kulmala, M., Petäjä, T., Mönkkönen, P., Koponen, I. K., Dal Maso, M., Aalto, P. P., Lehtinen, K. E. J.,  
29 and Kerminen, V. M.: On the growth of nucleation mode particles: source rates of condensable  
30 vapor in polluted and clean environments, *Atmos. Chem. Phys.*, 5, 409-416, 10.5194/acp-5-409-  
31 2005, 2005.
- 32 Kyrö, E. M., Kerminen, V. M., Virkkula, A., Dal Maso, M., Parshintsev, J., Ruíz-Jimenez, J., Forsström,  
33 L., Manninen, H. E., Riekkola, M. L., Heinonen, P., and Kulmala, M.: Antarctic new particle  
34 formation from continental biogenic precursors, *Atmos. Chem. Phys.*, 13, 3527-3546, 10.5194/acp-  
35 13-3527-2013, 2013.
- 36 Nguyen, Q. T., Glasius, M., Sørensen, L. L., Jensen, B., Skov, H., Birmili, W., Wiedensohler, A.,  
37 Kristensson, A., Nøjgaard, J. K., and Massling, A.: Seasonal variation of atmospheric particle  
38 number concentrations, new particle formation and atmospheric oxidation capacity at the high  
39 Arctic site Villum Research Station, Station Nord, *Atmos. Chem. Phys.*, 16, 11319-11336,  
40 10.5194/acp-16-11319-2016, 2016.
- 41 O'Dowd, C. D., Hämeri, K., Mäkelä, J., Väkevä, M., Aalto, P., De Leeuw, G., Kunz, G. J., Becker, E.,  
42 Hansson, H. C., Allen, A. G., Harrison, R. M., Berresheim, H., Kleefeld, C., Geever, M., Jennings,  
43 S. G., and Kulmala, M.: Coastal new particle formation: Environmental conditions and aerosol



1 physicochemical characteristics during nucleation bursts, *J. Geophys. Res.: Atmos.*, 107,  
2 10.1029/2000JD000206, 2002.

3 Park, J., Sakurai, H., Vollmers, K., and McMurry, P. H.: Aerosol size distributions measured at the  
4 South Pole during ISCAT, *Atmos. Environ.*, 38, 5493-5500, 10.1016/j.atmosenv.2002.12.001, 2004.

5 Park, K., Kim, J. S., and Seung, H. P.: Measurements of hygroscopicity and volatility of atmospheric  
6 ultrafine particles during ultrafine particle formation events at urban, industrial, and coastal sites,  
7 *Environ. Sci. Technol.*, 43, 6710-6716, 2009.

8 Pierce, J. R., and Adams, P. J.: Efficiency of cloud condensation nuclei formation from ultrafine  
9 particles, *Atmos. Chem. Phys.*, 7, 1367-1379, 10.5194/acp-7-1367-2007, 2007.

10 Pierce, J. R., Westervelt, D. M., Atwood, S. A., Barnes, E. A., and Leitch, W. R.: New-particle  
11 formation, growth and climate-relevant particle production in Egbert, Canada: analysis from 1 year  
12 of size-distribution observations, *Atmos. Chem. Phys.*, 14, 8647-8663, 10.5194/acp-14-8647-2014,  
13 2014.

14 Rose, C., Sellegri, K., Velarde, F., Moreno, I., Ramonet, M., Weinhold, K., Krejci, R., Andrade, M.,  
15 Wiedensohler, A., and Laj, P.: Frequent nucleation events at the high altitude station of Chacaltaya  
16 (5240m a.s.l.), Bolivia, *Atmos. Environ.*, 102, 18-29, 10.1016/j.atmosenv.2014.11.015, 2015.

17 Rose, C., Sellegri, K., Moreno, I., Velarde, F., Ramonet, M., Weinhold, K., Krejci, R., Andrade, M.,  
18 Wiedensohler, A., Ginot, P., and Laj, P.: CCN production by new particle formation in the free  
19 troposphere, *Atmos. Chem. Phys.*, 17, 1529-1541, 10.5194/acp-17-1529-2017, 2017.

20 Shen, X., Sun, J., Zhang, X., Zhang, Y., Zhang, L., and Fan, R.: Key features of new particle formation  
21 events at background sites in China and their influence on cloud condensation nuclei, *Front.*  
22 *Environ. Sci. Eng.*, 10, 05, 10.1007/s11783-016-0833-2, 2016.

23 Spracklen, D. V., Carslaw, K. S., Kulmala, M., Kerminen, V. M., Mann, G. W., and Sihto, S. L.: The  
24 contribution of boundary layer nucleation events to total particle concentrations on regional and  
25 global scales, *Atmos. Chem. Phys.*, 6, 5631-5648, 10.5194/acp-6-5631-2006, 2006.

26 Stein, A. F., Draxler, R. R., Rolph, G. D., Stunder, B. J. B., Cohen, M. D., and Ngan, F.: NOAA's hysplit  
27 atmospheric transport and dispersion modeling system, *Bull. Amer. Meteorol. Soc.*, 96, 2059-2077,  
28 10.1175/bams-d-14-00110.1, 2015.

29 Twomey, S.: The Influence of Pollution on the Shortwave Albedo of Clouds, *J. Atmos. Sci.*, 34, 1149-  
30 1152, 10.1175/1520-0469(1977)034<1149:Tiopot>2.0.Co;2, 1977.

31 Virkkula, A., Asmi, E., Teinilä, K., Frey, A., Aurela, M., Timonen, H., Mäkelä, T., Samuli, A., Hillamo,  
32 R., Aalto, P. P., Kirkwood, S., and Kulmala, M.: Review of aerosol research at the Finnish Antarctic  
33 research station Aboa and its surroundings in Queen Maud Land, Antarctica, *Geophysica*, 45, 163-  
34 181, 2009.

35 Warren, D. R., and Seinfeld, J. H.: Prediction of aerosol concentrations resulting from a burst of  
36 nucleation, *J Colloid Interf. Sci.*, 105, 136-142, [https://doi.org/10.1016/0021-9797\(85\)90356-X](https://doi.org/10.1016/0021-9797(85)90356-X),  
37 1985.

38 Weingartner, E., Nyeki, S., and Baltensperger, U.: Seasonal and diurnal variation of aerosol size  
39 distributions ( $10 < D < 750$  nm) at a high-alpine site (Jungfrauoch 3580 m asl), *J. Geophys. Res.:*  
40 *Atmos.*, 104, 26809-26820, 1999.

41 Weller, R., Schmidt, K., Teinilä, K., and Hillamo, R.: Natural new particle formation at the coastal  
42 Antarctic site Neumayer, *Atmos. Chem. Phys.*, 15, 11399-11410, 10.5194/acp-15-11399-2015,  
43 2015.

- 1 Willis, M. D., Burkart, J., Thomas, J. L., Köllner, F., Schneider, J., Bozem, H., Hoor, P. M., Aliabadi,  
2 A. A., Schulz, H., Herber, A. B., Leaitch, W. R., and Abbatt, J. P. D.: Growth of nucleation mode  
3 particles in the summertime Arctic: A case study, *Atmos. Chem. Phys.*, 16, 7663-7679,  
4 10.5194/acp-16-7663-2016, 2016.
- 5 Woo, K. S., Chen, D. R., Pui, D. Y. H., and McMurry, P. H.: Measurement of Atlanta aerosol size  
6 distributions: Observations of ultrafine particle events, *Aerosol Sci. Technol.*, 34, 75-87, 2001.
- 7 Yli-Juuti, T., Riipinen, I., Aalto, P. P., Nieminen, T., Maenhaut, W., Janssens, I. A., Claeys, M., Salma,  
8 I., Ocskay, R., Hoffer, A., Imre, K., and Kulmala, M.: Characteristics of new particle formation  
9 events and cluster ions at K-pusztá, Hungary, *Boreal Environ. Res.*, 14, 683-698, 2009.
- 10 Yoon, Y. J., O'Dowd, C. D., Jennings, S. G., and Lee, S. H.: Statistical characteristics and predictability  
11 of particle formation events at Mace Head, *J. Geophys. Res.: Atmos.*, 111, 10.1029/2005JD006284,  
12 2006.
- 13 Yu, F., and Luo, G.: Oceanic dimethyl sulfide emission and new particle formation around the coast of  
14 antarctica: A modeling study of seasonal variations and comparison with measurements,  
15 *Atmosphere*, 1, 34-50, 10.3390/atmos1010034, 2010.
- 16  
17

1

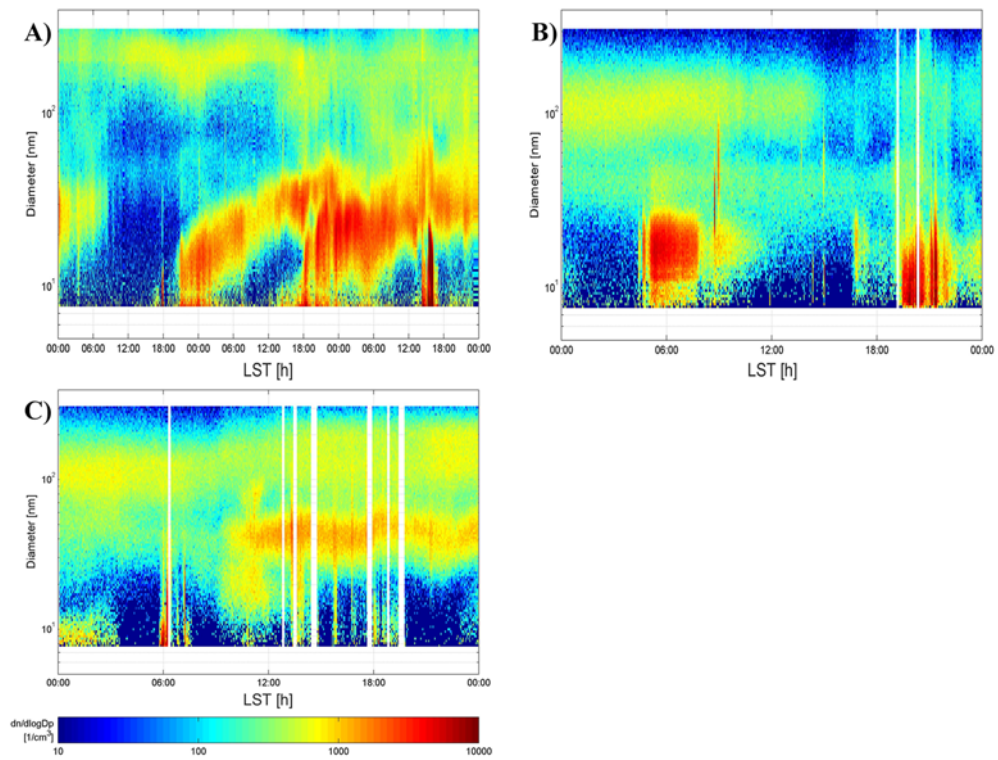

2

3

4 Figure 1. Example of types of the NPF based on the SMPS data. (a) type A (18 January 2011-20 January 2011),  
5 (b) type B (13 January 2015) and (c) type C (9 January 2015). Type A is days when the formation and growth  
6 of nanoparticles should be clear. Type B is days when the formation occurred but growth was not clear. Type C  
7 is days when it cannot be said whether there is an event or not.

8

1

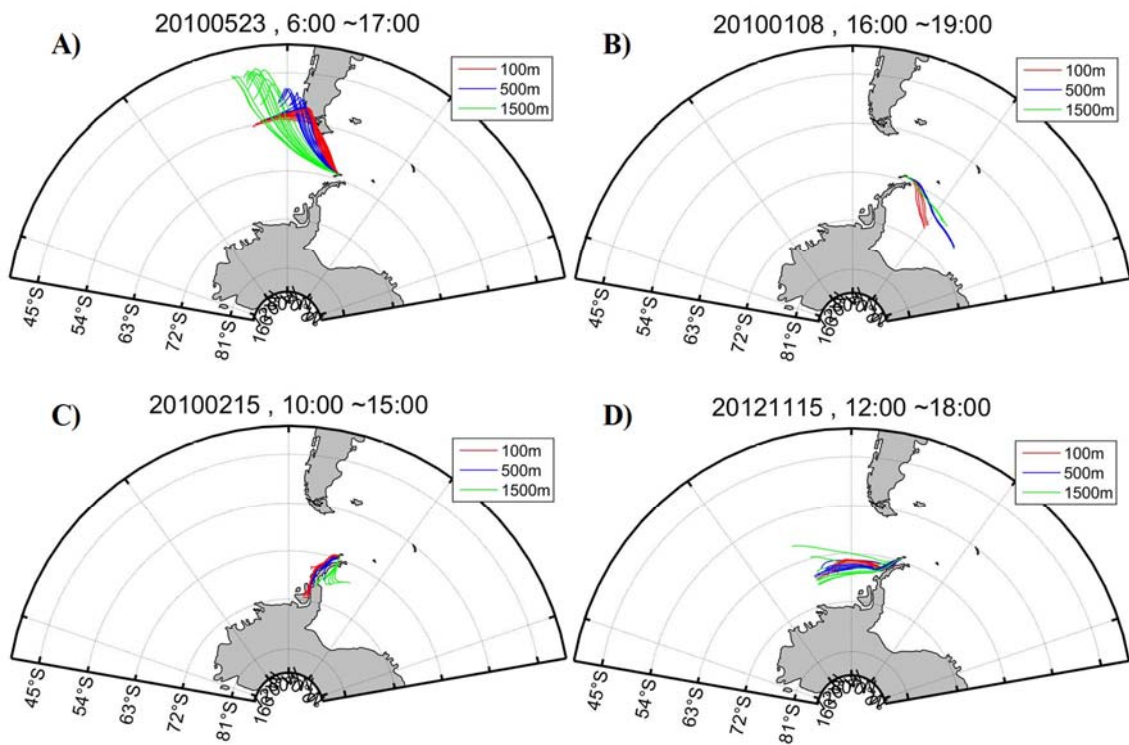

2

3

4 Figure 2. Example of the four cases considering to the air mass origin and pathway: (a) South  
5 America, (b) Weddell Sea, (c) Antarctic Peninsula, and (d) Bellingshausen Sea. Typical 48-h air mass  
6 backward trajectories were analyzed, ending at heights of 100m (Red line), 500m (Blue line) and  
7 1500m (Green line) above the ground level of the sampling site.

8

9

10

11

12

1  
2

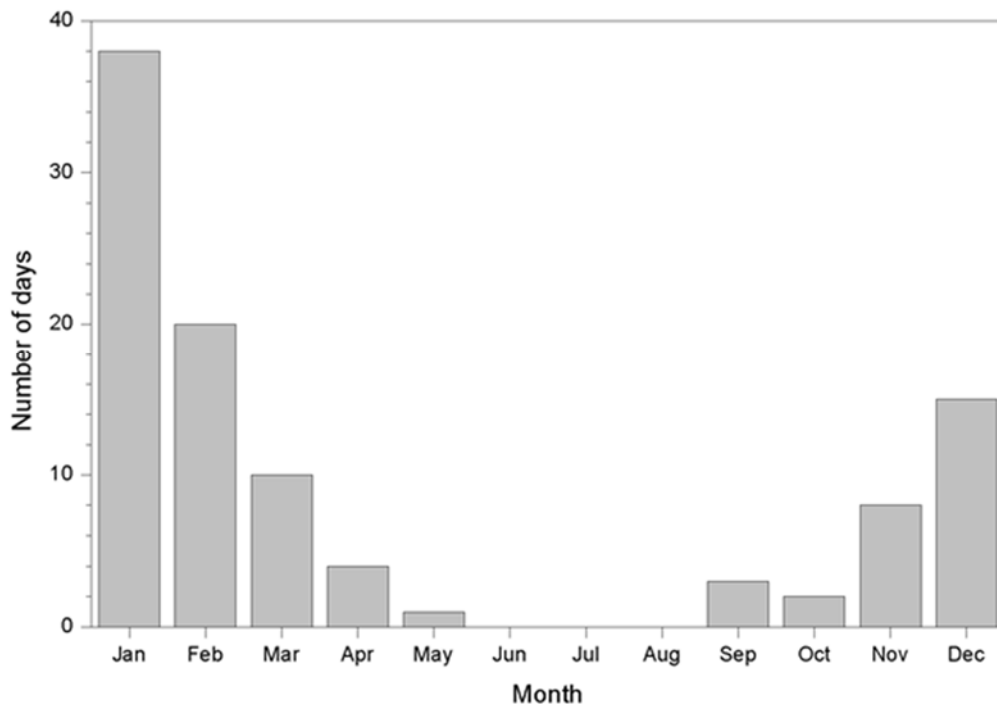

3  
4  
5  
6  
7

Figure 3. Monthly variation in the number of NPF days between March 2009 and December 2016.

1  
2

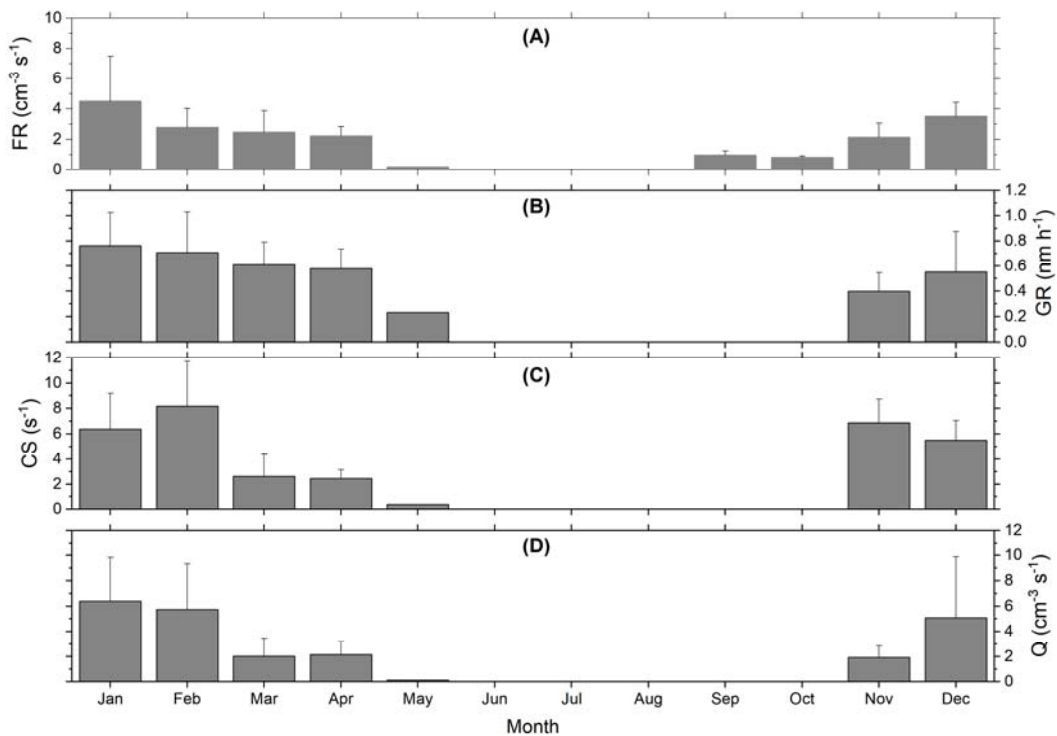

3  
4  
5  
6  
7  
8  
9  
10

Figure 4. Monthly variations of (a) the formation rates (FR), (b) the growth rates (GR) of nucleation mode particles ranging from 10 nm to 25 nm, (c) the condensation sink (CS), and (d) the source rate of condensable vapor (Q). The error bars represent a standard deviation. The GRs in September and October were not shown due to mechanical trouble of the instruments.

1

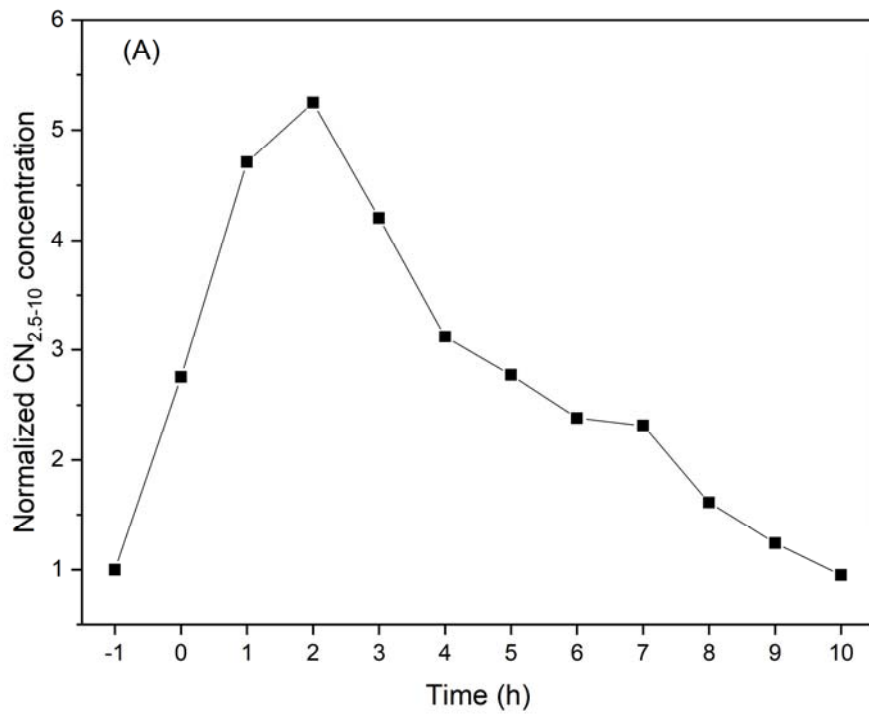

2

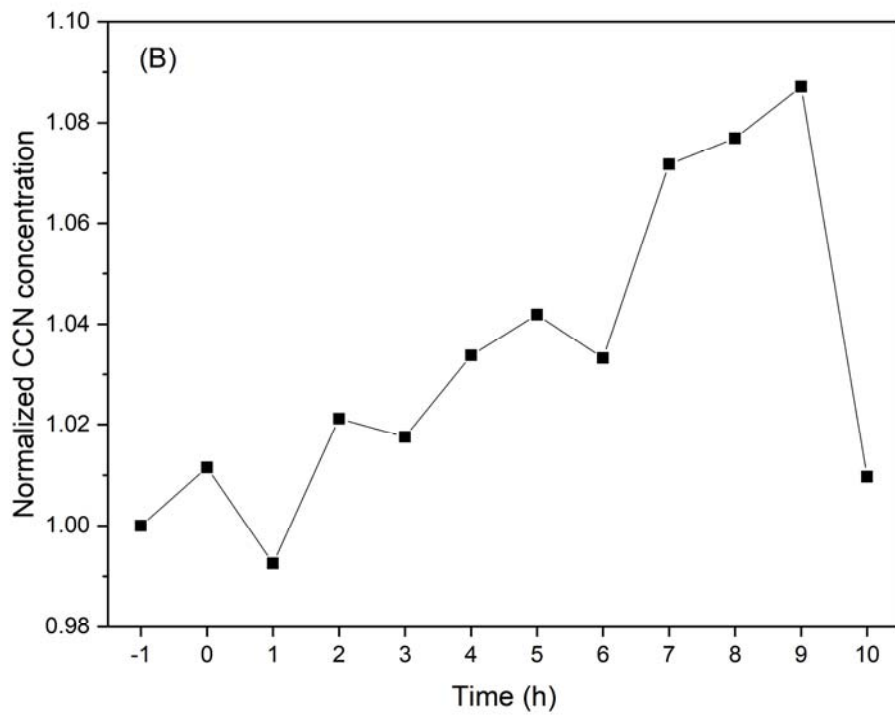

3

4

5 Figure 5. Variation in normalized (a)  $CN_{2.5-10}$  and (b) CCN concentration with time. The zero in the x-  
6 axis indicates the start time of the NPF events.

1  
2

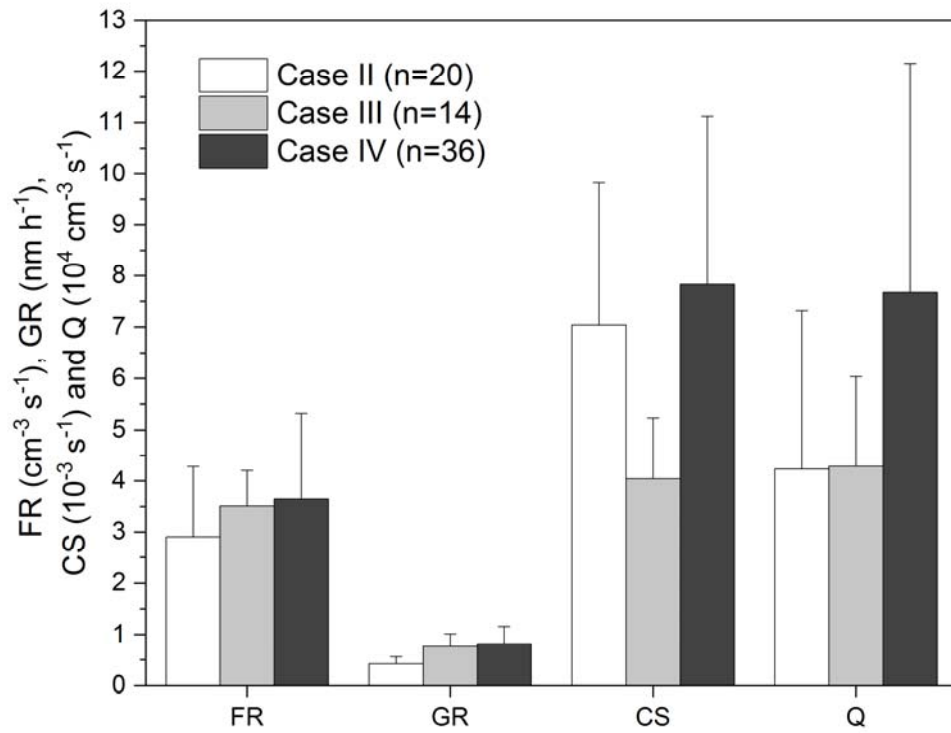

3  
4  
5  
6  
7  
8  
9

Figure 6. Comparison of NPF characteristics including the formation rate (FR), growth rate (GR), condensation sink (CS) and source rate of condensable vapors (Q) depending on the origins and pathway of air masses during the astral summer period. The error bars represent standard deviation.



1  
2

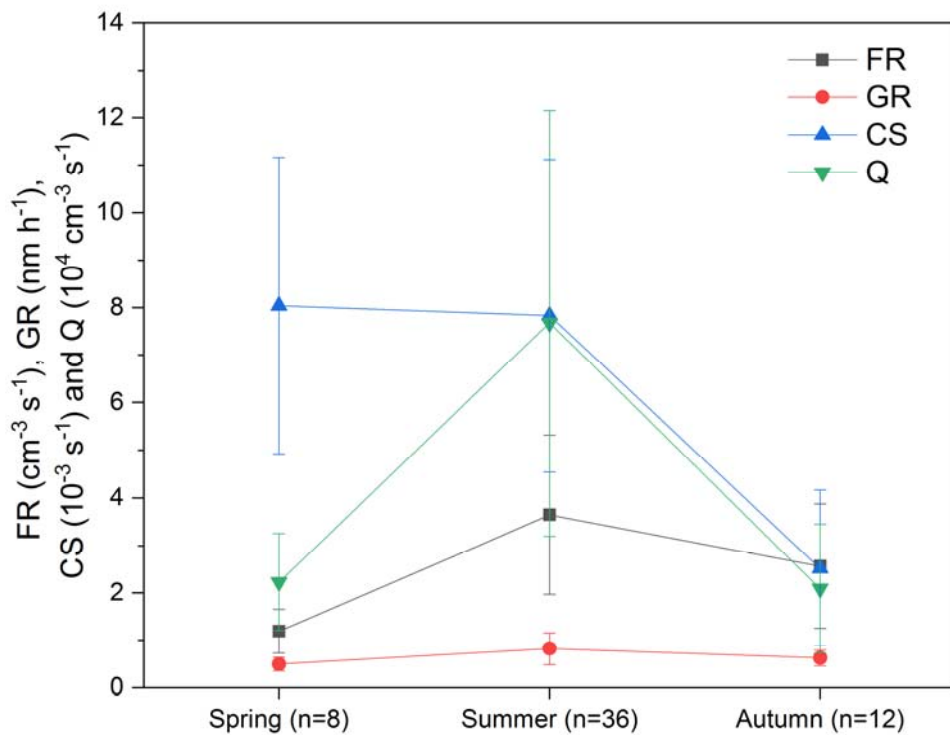

3  
4  
5  
6  
7  
8  
9  
10

Figure 7. Seasonal characteristics of parameters related to NPF events in which the air masses originated from the Bellingshausen Sea. FR, GR, CS, and Q refer to formation rate, growth rate, condensation sink, and source rate of condensing vapor, respectively. The error bars represent standard deviation.

1

2 Table 1. Summary of data acquisition rate for each instrument during the analysis periods

| Measurement parameter                                  | Instrument     | Data acquisition rate(%) |
|--------------------------------------------------------|----------------|--------------------------|
| Number concentration of particle<br>larger than 2.5 nm | CPC (TSI 3776) | 80.7                     |
| Number concentration of particle<br>larger than 10 nm  | CPC (TSI 3772) | 79.5                     |
| Size distribution                                      | SMPS           | 40.3                     |
| CCN concentrations                                     | CCNC           | 36.4                     |

3

4

5

6 Table 2. Event statistics classified by using total concentration data obtained from two CPCs

|            | Days | Percentage of total days |
|------------|------|--------------------------|
| NPF events | 101  | 6.1                      |
| Non events | 1554 | 93.9                     |
| Total      | 1655 |                          |

7

1 Table 3. Summary of the formation rates observed at different sampling site in Antarctica and in other continents. DMPS, SMPS, and CPC mean  
 2 differential mobility particle sizer, scanning mobility particle sizer, and condensation particle counter, respectively.

3

| Site                              | Period                                             | Method                            | Formation rates (cm <sup>-3</sup> s <sup>-1</sup> ) |                                   | References               |
|-----------------------------------|----------------------------------------------------|-----------------------------------|-----------------------------------------------------|-----------------------------------|--------------------------|
| King Sejong (Antarctic Peninsula) | 03/2009 ~ 12/2016                                  | Two CPCs<br>(TSI 3772 & TSI 3776) | J <sub>2.5-10</sub>                                 | 2.79                              | This study               |
| Syowa (Antarctica)                | 08/1978 ~ 12/1978                                  |                                   | J <sub>10</sub>                                     | 3.8×10 <sup>-4</sup>              | Ito, 1993                |
| Dome C (Antarctica)               | 12/2007 ~ 11/2009                                  | DMPS                              | J <sub>10</sub>                                     | 0.038                             | Järvinen et al., 2013    |
| Aboa (Antarctica)                 | 01/2010                                            | DMPS                              | J <sub>10</sub>                                     | 0.003 ~ 0.3                       | Kyrö et al., 2013        |
| Neumayer (Antarctica)             | 20/01/2012 ~ 26/03/2012<br>01/02/2014 ~ 30/04/2014 | SMPS                              | J <sub>3-25</sub>                                   | 0.02 ~ 0.1                        | Weller et al., 2015      |
| Värriö (Sub Arctic)               | 12/1997 ~ 07/2001                                  | DMPS                              | J <sub>10</sub>                                     | 0.38                              | Dal Maso, 2002           |
| Hyytiälä (Rural)                  | 1996 ~ 2003                                        | DMPS                              | J <sub>3-25</sub>                                   | 0.61                              | Dal Maso et al., 2005    |
| Mace Head (Coastal)               | 1996 ~ 1997                                        | Two CPCs<br>(TSI 3022 & TSI 3025) | J <sub>3-10</sub>                                   | 10 <sup>2</sup> ~ 10 <sup>4</sup> | Grenfell et al., 1999    |
| Jungfrauoch (Remote)              | 03/1997 ~ 05/1998                                  | SMPS                              | J <sub>10</sub>                                     | 0.14                              | Weingartner et al., 1999 |
| Dresden area (Rural)              | 1996 ~ 1998                                        | Two CPCs<br>(UCPC & CPC)          | J <sub>10</sub>                                     | 110                               | Keil and Wendisch, 2001  |
| Atlanta (Urban)                   | 08/1998 ~ 08/1999                                  | Nano-SMPS                         | J <sub>3</sub>                                      | 10 ~ 15                           | Woo et al., 2001         |
| Shangdianzi (Rural)               | 03/2008 ~ 12/2013                                  | DMPS                              | J <sub>3</sub>                                      | 6.3                               | Shen et al., 2016        |

Table 4. NPF event classification statistics using size distribution results. Type A refers to days in which the formation and growth of particles were clear. Type B refer to days in which the formation occurred but the growth was not clear. Type C refers to days in which the event occurrence was unclear.

|        | Days | Percentage of NPF days |
|--------|------|------------------------|
| Type A | 2    | 2.0                    |
| Type B | 37   | 36.6                   |
| Type C | 62   | 61.4                   |
| Total  | 101  |                        |

Table 5. Summary of NPF characteristic statics depending on the air mass origin. FR is the formation rate, GR is the growth rate, CS is the condensation sink, and Q is the source rate of condensable vapor. Case I, Case II, Case III, and Case IV refer to the origin and pathway of air masses from South America, the Weddell Sea, the Antarctic Peninsula, and the Bellingshausen Sea, respectively.

|          | NPF days | FR<br>( $\text{cm}^{-3} \text{s}^{-1}$ ) | GR<br>( $\text{nm h}^{-1}$ ) | CS<br>( $10^{-3} \text{s}^{-1}$ ) | Q<br>( $10^4 \text{cm}^{-3} \text{s}^{-1}$ ) |
|----------|----------|------------------------------------------|------------------------------|-----------------------------------|----------------------------------------------|
| Case I   | 3        |                                          |                              |                                   |                                              |
| Case II  | 24       | $2.81 \pm 1.29$                          | $0.41 \pm 0.15$              | $6.95 \pm 2.65$                   | $3.87 \pm 2.90$                              |
| Case III | 16       | $3.10 \pm 0.80$                          | $0.77 \pm 0.25$              | $4.19 \pm 1.30$                   | $4.29 \pm 1.75$                              |
| Case IV  | 56       | $3.08 \pm 1.55$                          | $0.76 \pm 0.30$              | $6.79 \pm 3.20$                   | $6.20 \pm 4.08$                              |

*Supplement of*

**New particle formation observed at King Sejong Station, Antarctic Peninsula – Part 1: Physical characteristics and contribution to cloud condensation nuclei**

Jaeseok Kim et al.

Correspondence to: Young Jun Yoon ([yjyoon@kopri.re.kr](mailto:yjyoon@kopri.re.kr))

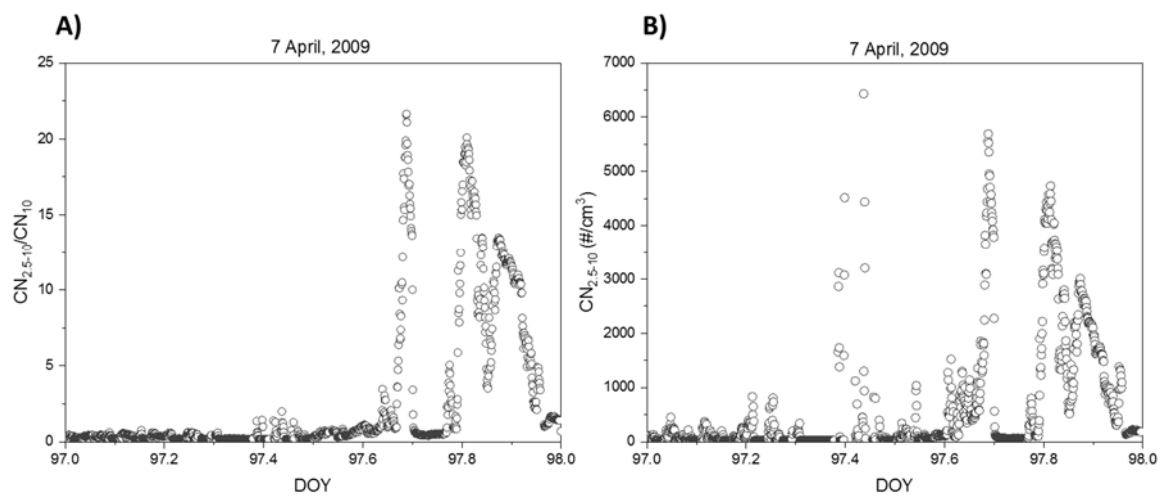

Figure S1. Example for estimation of the formation rate during NPF event on 7 April 2009: (a)  $CN_{2.5-10}/CN_{10}$  and (b)  $CN_{2.5-10}$  concentration with 1-minute time resolution.

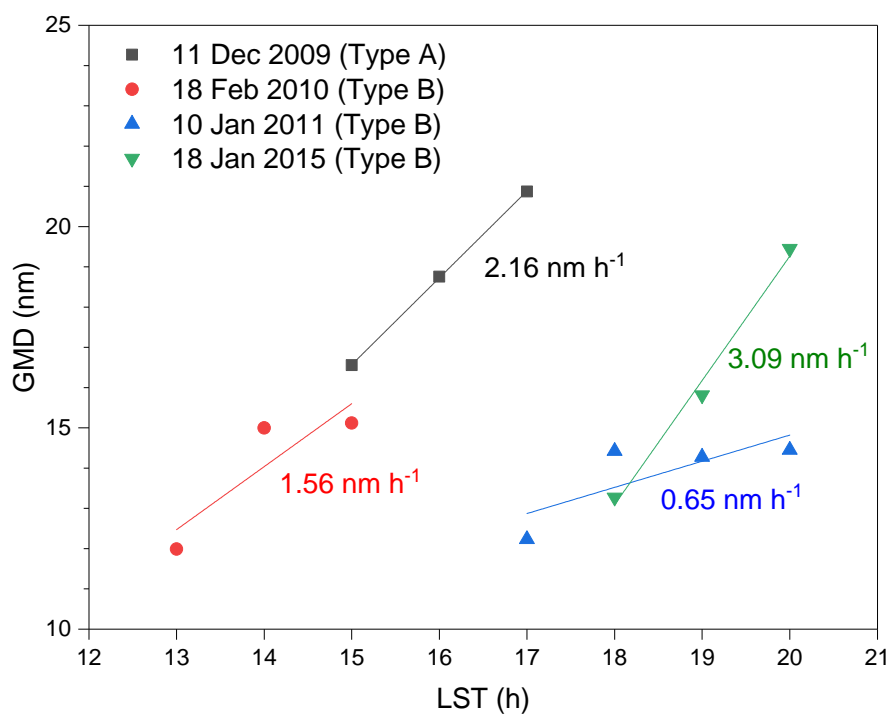

Figure S2. Geometric mean diameter (GMD) of particles ranging from 10 nm to 25 nm as a function of the time: the growth rate (nm h<sup>-1</sup>) was calculated as the regression slope. The LST means local standard time.

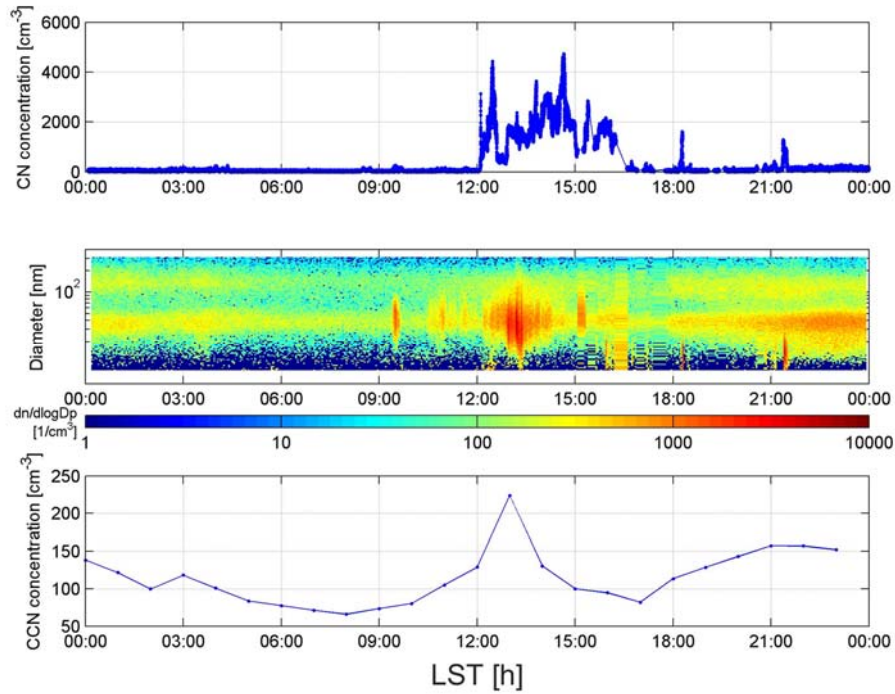

Figure S3. Example of comparison among CN concentrations from CPC data (upper panel), size distribution from SMPS data (middle panel) and hourly mean CCN concentration (bottom panel) at 0.4% supersaturation value as a function of time on 30 March 2009.



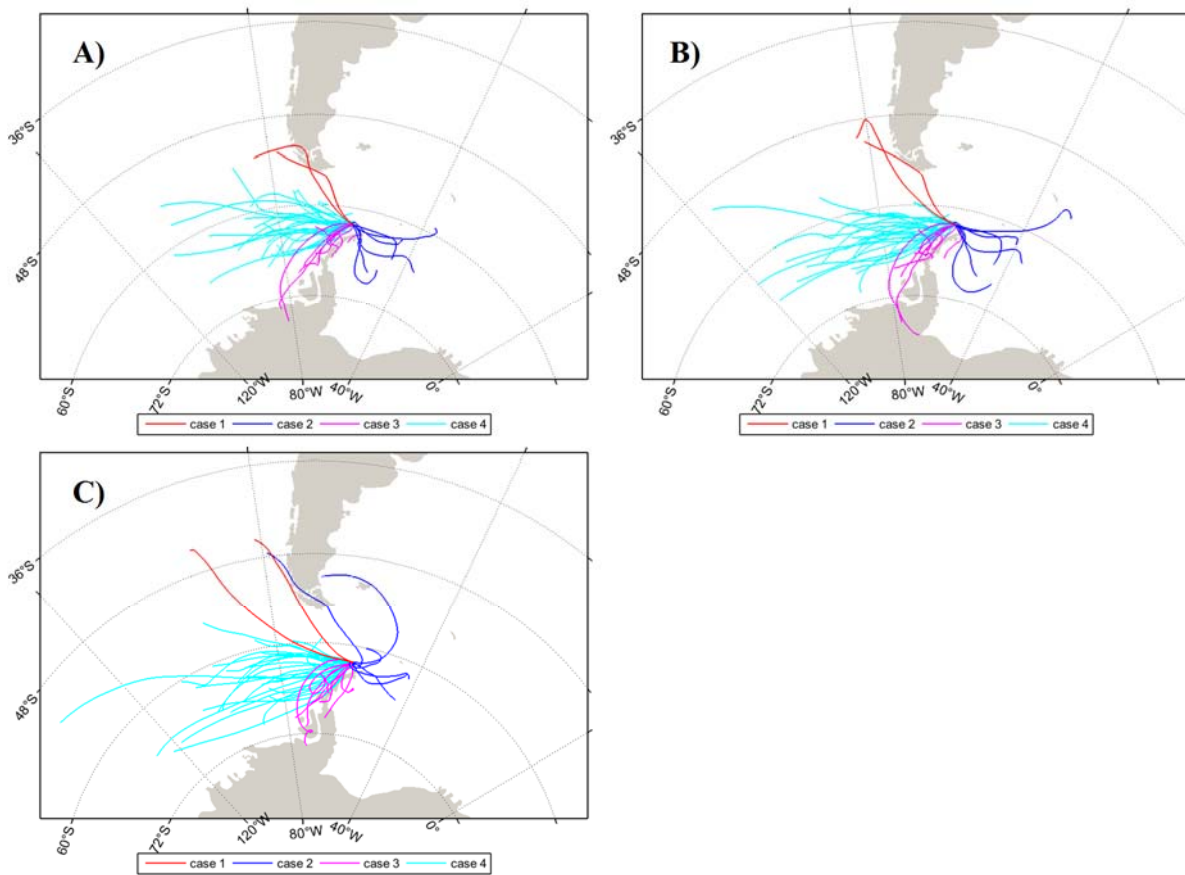

Figure S4. 48-h air mass backward trajectories at height of (a) 100m, (b) 500 m and (c) 1500 m above the ground level of the sampling site. Because 2-day trajectories can't be classified in four cases based on category method in this study, 99-day trajectories were shown. Red, blue, pink and cyan colored line indicate that air masses originated from the South America area (Case I), Weddell Sea (Case II), Antarctic Peninsula area (Case III) and Bellingshausen Sea (Case IV), respectively.
